# Supplementary material for: A catalyst-free multicomponent domino sequence for the diastereoselective synthesis of (E)-3-[2-arylcarbonyl-3-(arylamino)allyl]chromen-4-ones
Source: publisher site journal article supplement (doi:10.3762/bjoc.10.43), 2014-02-21
Supplement: Additional file 1 [file 1860-5397-10-43-S1.pdf]

**Supporting Information**  
for  
**A catalyst-free multicomponent domino sequence for the  
diastereoselective synthesis of (*E*)-3-[2-arylcarbonyl-3-  
(arylamino)allyl]chromen-4-ones**

Pitchaimani Prasanna<sup>1</sup>, Pethaiah Gunasekaran<sup>1</sup>, Subbu Perumal\*<sup>1</sup> and J. Carlos Menéndez\*<sup>2</sup>

Address: <sup>1</sup>Department of Organic Chemistry, School of Chemistry, Madurai Kamaraj University, Madurai - 625 021, Tamilnadu, India and <sup>2</sup>Departamento de Química Orgánica and Farmacéutica, Facultad de Farmacia, Universidad Complutense, 28040 Madrid, Spain

Email: Subbu Perumal - [subbu.perum@gmail.com](mailto:subbu.perum@gmail.com); J. Carlos Menéndez - [josecm@farm.ucm.es](mailto:josecm@farm.ucm.es)

\*Corresponding author

Experimental details, full characterization data, detailed structural characterization of compound **5h** and copies of the spectra of all compounds

## 1. Experimental details and full characterization data

**General experimental methods.** Melting points were measured in open capillary tubes and are uncorrected. The  $^1\text{H}$  NMR,  $^{13}\text{C}$  NMR, DEPT, H,H-COSY, C,H-COSY and HMBC spectra were recorded on a Bruker (Avance) 300 MHz NMR instrument using TMS as internal standard and  $\text{CDCl}_3$  as solvent. Standard Bruker software was used throughout. Chemical shifts are given in parts per million ( $\delta$ -scale) and the coupling constants are given in Hertz. Silica gel-G plates (Merck) were used for TLC analysis with a mixture of petroleum ether (60–80 °C) and ethyl acetate as eluent. Elemental analyses were performed on a Perkin Elmer 2400 Series II Elemental CHNS analyzer.

**General procedure for the synthesis of (*E*)-3-(2-arylcarbonyl-3-(arylamino)allyl)-4*H*-chromen-4-one 5a–5p.** A mixture of 3-formylchromone (**1**, 1 mmol), enaminone **2** (1 mmol) and aniline **3** (1 mmol) in DMF (5 mL) was heated at 130 °C for 6–7 h. The reaction progress was monitored by thin-layer chromatography. After completion of the reaction, the solvent was removed and the product was purified by column chromatography using petroleum ether–ethyl acetate mixture (4:1 v/v) as eluent to afford (*E*)-3-(2-arylcarbonyl-3-(arylamino)allyl)-4*H*-chromen-4-ones **5**.

**(*E*)-3-(2-Benzoyl-3-(*p*-tolylamino)allyl)-4*H*-chromen-4-one (5a):** Isolated yield 0.336 g (85%); Colorless solid; m.p. 215–216 °C.  $^1\text{H}$  NMR (300 MHz,  $\text{CDCl}_3$ ,  $\delta$  ppm): 2.28 (s, 3H), 3.71 (s, 2H), 6.92 (d,  $J = 8.4$  Hz, 2H), 7.08 (d,  $J = 8.1$  Hz, 2H), 7.37–7.45 (m, 4H), 7.47–7.56 (m, 4H), 7.66–7.71 (m, 1H), 8.31 (d,  $J = 7.8$  Hz, 1H), 8.52 (s, 1H), 9.93 (d,  $J = 12.6$  Hz, 1H);  $^{13}\text{C}$  NMR (75 MHz,  $\text{CDCl}_3$ ,  $\delta$  ppm): 20.1, 20.6, 113.3, 115.8, 118.3, 123.7, 123.9, 125.0, 125.9, 128.0, 128.5, 129.8, 130.1, 132.3, 133.7, 138.9, 140.9, 146.6, 156.2, 156.7, 179.8, 195.0; HRMS (ESI) calcd for  $\text{C}_{26}\text{H}_{20}\text{NO}_3$  [ $\text{M} - \text{H}$ ] $^-$  394.14432; found 394.144817. Anal. Calcd for  $\text{C}_{26}\text{H}_{21}\text{NO}_3$ : C, 78.97; H, 5.35; N, 3.54. Found: C, 79.02; H, 5.29; N, 3.62.

**(E)-3-(2-(4-Chlorobenzoyl)-3-(p-tolylamino)allyl)-4H-chromen-4-one (5b):** Isolated yield 0.374 g (87%); Colorless solid; m.p. 250-251 °C. <sup>1</sup>H NMR (300 MHz, CDCl<sub>3</sub>, δ ppm): 2.30 (s, 3H), 3.69 (s, 2H), 6.93 (d, *J* = 8.4 Hz, 2H), 7.10 (d, *J* = 8.1 Hz, 2H), 7.35-7.40 (m, 2H), 7.43-7.48 (m, 4H), 7.51 (s, 1H), 7.69 (td, *J* = 9 Hz, 1.8 Hz, 1H), 8.30 (dd, *J* = 6.0 Hz, 1.5 Hz, 1H), 8.50 (s, 1H), 10.0 (d, *J* = 12.6 Hz, 1H); <sup>13</sup>C NMR (75 MHz, CDCl<sub>3</sub>, δ ppm): 20.2, 20.7, 113.2, 115.9, 118.3, 123.6, 123.7, 125.1, 125.9, 128.3, 129.9, 130.1, 132.6, 133.8, 136.0, 138.7, 139.3, 146.6, 156.1, 156.7, 179.8, 193.6; HRMS (ESI) calcd for C<sub>26</sub>H<sub>19</sub>ClNO<sub>3</sub> [M - H]<sup>-</sup> 428.10535; found 428.10589. Anal. Calcd for C<sub>26</sub>H<sub>20</sub>ClNO<sub>3</sub>: C, 72.64; H, 4.69; N, 3.26. Found: C, 72.77; H, 4.77; N, 3.15.

**(E)-3-(2-(3-Nitrobenzoyl)-3-(p-tolylamino)allyl)-4H-chromen-4-one (5c):** Isolated yield 0.396 g (90%); Yellow solid; m.p. 206-207 °C. <sup>1</sup>H NMR (300 MHz, CDCl<sub>3</sub>, δ ppm): 2.32 (s, 3H), 3.72 (s, 2H), 6.93 (d, *J* = 8.4 Hz, 2H), 7.10 (d, *J* = 8.1 Hz, 2H), 7.40-7.53 (m, 3H), 7.59 (d, *J* = 8.0 Hz, 1H), 7.68-7.74 (m, 1H), 7.81 (d, *J* = 7.5 Hz, 1H), 8.28-8.35 (m, 3H), 8.51 (s, 1H), 10.2 (d, *J* = 12.6 Hz, 1H); <sup>13</sup>C NMR (75 MHz, CDCl<sub>3</sub>, δ ppm): 20.1, 20.7, 113.0, 116.2, 118.4, 123.3, 123.6, 123.7, 124.4, 125.2, 125.9, 129.2, 130.2, 133.1, 133.9, 134.1, 138.4, 142.5, 147.3, 148.0, 156.1, 156.7, 179.9, 191.8; HRMS (ESI) calcd for C<sub>26</sub>H<sub>19</sub>N<sub>2</sub>O<sub>5</sub> [M - H]<sup>-</sup> 439.12940; found 439.12995. Anal. Calcd for C<sub>26</sub>H<sub>20</sub>N<sub>2</sub>O<sub>5</sub>: C, 70.90; H, 4.58; N, 6.36. Found: C, 70.84; H, 4.62; N, 6.29.

**(E)-3-(2-Benzoyl-3-(4-methoxyphenylamino)allyl)-4H-chromen-4-one (5d):** Isolated yield 0.392 g (89%); Colorless solid; m.p. 212-213 °C. <sup>1</sup>H NMR (300 MHz, CDCl<sub>3</sub>, δ ppm): 3.71 (s, 2H), 3.77 (s, 3H), 6.83 (d, *J* = 9.0 Hz, 2H), 6.96 (d, *J* = 8.7 Hz, 2H), 7.35-7.43 (m, 4H), 7.45-7.51 (m, 4H), 7.66-7.71 (m, 1H), 8.29-8.32 (m, 1H), 8.53 (s, 1H), 9.90 (d, *J* = 12.6 Hz, 1H); <sup>13</sup>C NMR (75 MHz, CDCl<sub>3</sub>, δ ppm): 20.1, 55.6, 112.9, 115.0, 117.2, 118.3, 123.7, 123.9, 125.0, 125.8, 128.0, 128.4, 129.7, 133.7, 135.0, 141.0, 147.0, 155.7, 156.2, 156.7, 179.8, 194.8; HRMS (ESI) calcd for C<sub>26</sub>H<sub>20</sub>NO<sub>4</sub> [M - H]<sup>-</sup> 410.13923; found

410.13978. Anal. Calcd for C<sub>26</sub>H<sub>21</sub>NO<sub>4</sub>: C, 75.90; H, 5.14; N, 3.40. Found: C, 75.79; H, 5.05; N, 3.46.

**(E)-3-(2-(4-Chlorobenzoyl)-3-(4-methoxyphenylamino)allyl)-4H-chromen-4-one (5e):**

Isolated yield 0.405 g (91%); Colorless solid; m.p. 237-238 °C. <sup>1</sup>H NMR (300 MHz, CDCl<sub>3</sub>, δ ppm): 3.69 (s, 2H), 3.78 (s, 3H), 6.84-6.88 (m, 2H), 6.95-6.99 (m, 2H), 7.35-7.38 (m, 2H), 7.41-7.46 (m, 4H), 7.50 (d, *J* = 8.4 Hz, 1H), 7.67-7.72 (td, *J* = 7.5 Hz, 1.7 Hz, 1H), 8.30 (dd, *J* = 6.0 Hz, 1.5 Hz, 1H), 8.50 (s, 1H), 9.97 (d, *J* = 12.3 Hz, 1H); <sup>13</sup>C NMR (75 MHz, CDCl<sub>3</sub>, δ ppm): 20.2, 55.6, 112.8, 115.1, 117.3, 118.4, 123.7, 123.8, 125.1, 125.8, 128.3, 129.8, 133.8, 134.8, 135.9, 139.4, 147.1, 155.9, 156.2, 156.7, 179.9, 193.4; HRMS (ESI) calcd for C<sub>26</sub>H<sub>19</sub>ClNO<sub>4</sub> [M - H]<sup>-</sup> 444.10026; found 444.10081. Anal. Calcd for C<sub>26</sub>H<sub>20</sub>ClNO<sub>4</sub>: C, 70.03; H, 4.52; N, 3.14. Found: C, 69.91; H, 4.56; N, 3.23.

**(E)-3-(3-(4-Methoxyphenylamino)-2-(3-nitrobenzoyl)allyl)-4H-chromen-4-one (5f):**

Isolated yield 0.429 g (94%); Orange solid; m.p. 209-210 °C. <sup>1</sup>H NMR (300 MHz, CDCl<sub>3</sub>, δ ppm): 3.72 (s, 2H), 3.77 (s, 3H), 6.85 (d, *J* = 8.7 Hz, 2H), 6.98 (d, *J* = 8.7 Hz, 2H), 7.35-7.47 (m, 2H), 7.52 (d, *J* = 8.4 Hz, 1H), 7.59 (t, *J* = 8.0 Hz, 1H), 7.71 (t, *J* = 7.7 Hz, 1H), 7.82 (d, *J* = 7.5 Hz, 1H), 8.28-8.35 (m, 3H), 8.51 (s, 1H), 10.18 (d, *J* = 12.6 Hz, 1H); <sup>13</sup>C NMR (75 MHz, CDCl<sub>3</sub>, δ ppm): 20.1, 55.6, 112.6, 115.1, 117.6, 118.4, 123.2, 123.5, 123.6, 124.3, 125.2, 125.8, 129.2, 133.9, 134.1, 134.5, 142.6, 147.7, 148.0, 156.1, 156.2, 156.7, 179.9, 191.6; HRMS (ESI) calcd for C<sub>26</sub>H<sub>19</sub>N<sub>2</sub>O<sub>6</sub> [M - H]<sup>-</sup> 455.12431; found 455.12486. Anal. Calcd for C<sub>26</sub>H<sub>20</sub>N<sub>2</sub>O<sub>6</sub>: C, 68.42; H, 4.42; N, 6.14. Found: C, 68.50; H, 4.38; N, 6.04.

**(E)-3-(2-(4-Chlorobenzoyl)-3-(4-chlorophenylamino)allyl)-4H-chromen-4-one (5g):**

Isolated yield 0.387 g (86%); Colorless solid; m.p. 260-261 °C. <sup>1</sup>H NMR (300 MHz, CDCl<sub>3</sub>, δ ppm): 3.69 (s, 2H), 6.94-6.97 (m, 2H), 7.23-7.27 (m, 2H), 7.37-7.42 (m, 3H), 7.43-7.47 (m, 3H), 7.51 (d, *J* = 8.4 Hz, 1H), 7.70 (td, *J* = 7.5 Hz, 1.8 Hz, 1H), 8.30 (dd, *J* = 9 Hz, 1.5 Hz, 1H), 8.49 (s, 1H), 10.15 (d, *J* = 12.3 Hz, 1H); <sup>13</sup>C NMR (75 MHz, CDCl<sub>3</sub>, δ ppm): 20.3,

114.2, 117.0, 118.4, 123.5, 123.6, 125.2, 125.8, 127.8, 128.4, 129.7, 129.9, 133.9, 136.3, 139.0, 139.9, 145.7, 156.3, 156.7, 179.9, 193.8; HRMS (ESI) calcd for C<sub>25</sub>H<sub>16</sub>Cl<sub>2</sub>NO<sub>3</sub> [M - H]<sup>-</sup> 448.05072; found 448.05127. Anal. Calcd for C<sub>25</sub>H<sub>17</sub>Cl<sub>2</sub>NO<sub>3</sub>: C, 66.68; H, 3.81; N, 3.11. Found: C, 66.81; H, 3.74; N, 3.22.

**(E)-3-(3-(4-Chlorophenylamino)-2-(4-methylbenzoyl)allyl)-4H-chromen-4-one (5h):**

Isolated yield 0.361 g (84%); Colorless solid; m.p. 219-220 °C. <sup>1</sup>H NMR (300 MHz, CDCl<sub>3</sub>, δ ppm): 2.40 (s, 3H), 3.70 (s, 2H), 6.95 (d, *J* = 8.7 Hz, 2H), 7.19-7.26 (m, 4H), 7.40-7.46 (m, 3H), 7.48-7.52 (m, 2H), 7.69 (t, *J* = 7.1 Hz, 1H), 8.30 (d, *J* = 7.2 Hz, 1H), 8.51 (s, 1H), 10.04 (d, *J* = 12.3 Hz, 1H); <sup>13</sup>C NMR (75 MHz, CDCl<sub>3</sub>, δ ppm): 20.4, 21.4, 114.4, 116.8, 118.4, 123.7, 125.1, 125.8, 127.4, 128.6, 128.8, 129.5, 133.8, 137.7, 140.1, 140.4, 145.3, 156.3, 156.7, 179.9, 195.2; HRMS (ESI) calcd for C<sub>26</sub>H<sub>19</sub>ClNO<sub>3</sub> [M - H]<sup>-</sup> 428.10535; found 428.10589. Anal. Calcd for C<sub>26</sub>H<sub>20</sub>ClNO<sub>3</sub>: C, 72.64; H, 4.69; N, 3.26. Found: C, 72.57; H, 4.75; N, 3.31.

**(E)-3-(3-(4-Chlorophenylamino)-2-(4-methoxybenzoyl)allyl)-4H-chromen-4-one (5i):**

Isolated yield 0.365 g (82%); Colorless solid; m.p. 195-196 °C. <sup>1</sup>H NMR (300 MHz, CDCl<sub>3</sub>, δ ppm): 3.70 (s, 2H), 3.86 (s, 3H), 6.91 (d, *J* = 8.7 Hz, 2H), 6.96 (d, *J* = 8.7 Hz, 2H), 7.23-7.26 (m, 2H), 7.41-7.52 (m, 5H), 7.67-7.72 (m, 1H), 8.30 (dd, *J* = 6.0 Hz, 1.2 Hz, 1H), 8.51 (s, 1H), 10.01 (d, *J* = 12.0 Hz, 1H); <sup>13</sup>C NMR (75 MHz, CDCl<sub>3</sub>, δ ppm): 20.6, 55.4, 113.5, 114.3, 116.8, 118.4, 123.7, 125.1, 125.8, 127.3, 129.6, 130.5, 133.8, 140.2, 144.8, 156.3, 156.7, 161.5, 179.9, 194.5; HRMS (ESI) calcd for C<sub>26</sub>H<sub>19</sub>ClNO<sub>4</sub> [M - H]<sup>-</sup> 444.10026; found 444.10081. Anal. Calcd for C<sub>26</sub>H<sub>20</sub>ClNO<sub>4</sub>: C, 70.03; H, 4.52; N, 3.14. Found: C, 69.98; H, 4.59; N, 3.05.

**(E)-3-(3-(4-Chlorophenylamino)-2-(3-nitrobenzoyl)allyl)-4H-chromen-4-one (5j):**

Isolated yield 0.401 g (87%); Yellow solid; m.p. 227-228 °C. <sup>1</sup>H NMR (300 MHz, CDCl<sub>3</sub>, δ ppm): 3.72 (s, 2H), 6.96 (d, *J* = 8.7 Hz, 2H), 7.25 (d, *J* = 8.7 Hz, 2H), 7.35-7.54 (m, 3H),

7.61 (t,  $J = 7.8$  Hz, 1H), 7.70-7.75 (m, 1H), 7.82 (d,  $J = 7.5$  Hz, 1H), 8.30-8.35 (m, 3H), 8.51 (s, 1H), 10.37 (d,  $J = 12.3$  Hz, 1H);  $^{13}\text{C}$  NMR (75 MHz,  $\text{CDCl}_3$ ,  $\delta$  ppm): 20.3, 114.1, 117.2, 118.4, 123.2, 123.3, 123.6, 124.6, 125.3, 125.8, 128.3, 129.3, 129.7, 134.0, 139.6, 142.2, 146.4, 148.1, 156.3, 156.7, 180.0, 192.1; HRMS: calcd. for  $\text{C}_{25}\text{H}_{16}\text{ClN}_2\text{O}_5$  [ $\text{M} - \text{H}$ ] $^-$  459.07477; found 459.07532. Anal. Calcd for  $\text{C}_{25}\text{H}_{17}\text{ClN}_2\text{O}_5$ : C, 65.15; H, 3.72; N, 6.08. Found: C, 65.24; H, 3.68; N, 5.97.

**(E)-3-(2-Benzoyl-3-(4-bromophenylamino)allyl)-4H-chromen-4-one (5k):** Isolated yield 0.368 g (80%); Colorless solid; m.p. 231-232 °C.  $^1\text{H}$  NMR (300 MHz,  $\text{CDCl}_3$ ,  $\delta$  ppm): 3.70 (s, 2H), 6.89 (d,  $J = 8.7$  Hz, 2H), 7.36-7.40 (m, 3H), 7.43-7.46 (m, 3H), 7.48-7.52 (m, 4H), 7.67-7.73 (m, 1H), 8.30 (dd,  $J = 6.0$  Hz, 1.5 Hz, 1H), 8.52 (s, 1H), 10.09 (d,  $J = 12.3$  Hz, 1H);  $^{13}\text{C}$  NMR (75 MHz,  $\text{CDCl}_3$ ,  $\delta$  ppm): 20.3, 114.5, 114.9, 117.3, 118.4, 123.6, 125.2, 125.8, 128.1, 128.4, 130.1, 132.5, 133.9, 140.5, 140.6, 145.5, 156.3, 156.7, 179.9, 195.2; HRMS (ESI) calcd for  $\text{C}_{25}\text{H}_{17}\text{BrNO}_3$  [ $\text{M} - \text{H}$ ] $^-$  458.03918; found 458.03973. Anal. Calcd for  $\text{C}_{25}\text{H}_{18}\text{BrNO}_3$ : C, 65.23; H, 3.94; N, 3.04. Found: C, 65.35; H, 4.01; N, 2.98.

**(E)-3-(3-(4-Bromophenylamino)-2-(4-methylbenzoyl)allyl)-4H-chromen-4-one (5l):** Isolated yield 0.384 g (81%); Colorless solid; m.p. 223-224 °C.  $^1\text{H}$  NMR (300 MHz,  $\text{CDCl}_3$ ,  $\delta$  ppm): 2.40 (s, 3H), 3.70 (s, 2H), 6.90 (d,  $J = 8.7$  Hz, 2H), 7.21 (d,  $J = 8.1$  Hz, 2H), 7.36-7.41 (m, 3H), 7.43-7.52 (m, 4H), 7.69 (dd,  $J = 7.5$  Hz, 1.5 Hz, 1H), 8.30 (dd,  $J = 8.1$  Hz, 1.8 Hz, 1H), 8.51 (s, 1H), 10.04 (d,  $J = 12.0$  Hz, 1H);  $^{13}\text{C}$  NMR (75 MHz,  $\text{CDCl}_3$ ,  $\delta$  ppm): 20.4, 21.4, 114.5, 114.7, 117.2, 118.4, 123.6, 125.1, 125.8, 128.6, 128.8, 132.5, 133.8, 137.7, 140.4, 140.6, 145.1, 156.4, 156.7, 179.9, 195.2; HRMS (ESI) calcd for  $\text{C}_{26}\text{H}_{19}\text{BrNO}_3$  [ $\text{M} - \text{H}$ ] $^-$  472.05483; found 472.05538. Anal. Calcd for  $\text{C}_{26}\text{H}_{20}\text{BrNO}_3$ : C, 65.83; H, 4.25; N, 2.95. Found: C, 65.70; H, 4.34; N, 2.91.

**(E)-3-(3-(4-Fluorophenylamino)-2-(4-methylbenzoyl)allyl)-4H-chromen-4-one (5m):**

Isolated yield 0.343 g (83%); Colorless solid; m.p. 234-235 °C. <sup>1</sup>H NMR (300 MHz, CDCl<sub>3</sub>, δ ppm): 2.40 (s, 3H), 3.70 (s, 2H), 6.97-6.99 (m, 4H), 7.21 (d, *J* = 7.8 Hz, 2H), 7.26 (s, 1H), 7.40-7.44 (m, 2H), 7.46-7.51 (m, 2H), 7.70 (td, *J* = 7.5 Hz, 1.8 Hz, 1H), 8.30 (dd, *J* = 6.0 Hz, 1.4 Hz, 1H), 8.52 (s, 1H), 9.97 (d, *J* = 12.3 Hz, 1H); <sup>13</sup>C NMR (75 MHz, CDCl<sub>3</sub>, δ ppm): 20.3, 21.4, 113.8, 116.1, 116.4, 116.9, 117.0, 118.4, 123.7, 123.8, 125.1, 125.8, 128.6, 128.8, 133.8, 137.7, 137.8, 137.9, 140.2, 146.1, 156.3, 156.7, 157.1, 160.3, 179.9, 195.1; HRMS (ESI) calcd for C<sub>26</sub>H<sub>19</sub>FNO<sub>3</sub> [M - H]<sup>-</sup> 412.13490; found 412.13545. Anal. Calcd for C<sub>26</sub>H<sub>20</sub>FNO<sub>3</sub>: C, 75.53; H, 4.88; N, 3.39. Found: C, 75.65; H, 4.78; N, 3.47.

**(E)-3-(2-(4-Methylbenzoyl)-3-(3-nitrophenylamino)allyl)-4H-chromen-4-one (5n):**

Isolated yield 0.343 g (78%); Yellow solid; m.p. 255-256 °C. <sup>1</sup>H NMR (300 MHz, CDCl<sub>3</sub>, δ ppm): 2.33 (s, 3H), 3.63 (s, 2H), 7.15 (d, *J* = 6.6 Hz, 2H), 7.27-7.48 (m, 7H), 7.62-7.73 (m, 3H), 8.24 (d, *J* = 7.2 Hz, 1H), 8.43 (s, 1H), 10.34 (d, *J* = 11.1 Hz, 1H); <sup>13</sup>C NMR (75 MHz, CDCl<sub>3</sub>, δ ppm): 20.7, 21.4, 109.9, 115.9, 116.5, 118.3, 121.3, 123.3, 123.5, 125.2, 125.8, 128.7, 128.9, 130.3, 133.9, 137.3, 140.9, 142.9, 144.0, 149.4, 156.5, 156.6, 180.0, 195.4; HRMS (ESI) calcd for C<sub>26</sub>H<sub>19</sub>N<sub>2</sub>O<sub>5</sub> [M - H]<sup>-</sup> 439.12940; found 439.12995. Anal. Calcd for C<sub>26</sub>H<sub>20</sub>N<sub>2</sub>O<sub>5</sub>: C, 70.90; H, 4.58; N, 6.36. Found: C, 71.03; H, 4.68; N, 6.31.

**(E)-3-(2-(4-Chlorobenzoyl)-3-(phenylamino)allyl)-4H-chromen-4-one (5o):**

Isolated yield 0.357 g (86%); Colorless solid. m.p. 245-246 °C. <sup>1</sup>H NMR (300 MHz, CDCl<sub>3</sub>, δ ppm): 3.71 (s, 2H), 7.00-7.05 (m, 3H), 7.26-7.33 (m, 2H), 7.37-7.40 (m, 2H), 7.44-7.55 (m, 5H), 7.67-7.72 (m, 1H), 8.31 (d, *J* = 7.8 Hz, 1H), 8.50 (s, 1H), 10.08 (d, *J* = 12.3 Hz, 1H); <sup>13</sup>C NMR (75 MHz, CDCl<sub>3</sub>, δ ppm): 20.2, 113.7, 115.9, 118.4, 122.9, 123.7, 125.1, 125.9, 128.4, 129.7, 129.9, 133.8, 136.1, 139.2, 141.1, 146.2, 156.2, 156.7, 179.8, 193.8; HRMS (ESI) calcd for C<sub>25</sub>H<sub>17</sub>ClNO<sub>3</sub> [M - H]<sup>-</sup> 414.08970; found 414.09024. Anal. Calcd for C<sub>25</sub>H<sub>18</sub>ClNO<sub>3</sub>: C, 72.20; H, 4.36; N, 3.37. Found: C, 72.09; H, 4.24; N, 3.41.

**(E)-3-(2-(3-Nitrobenzoyl)-3-(phenylamino)allyl)-4H-chromen-4-one (5p):** Isolated yield 0.375 g (88%); Yellow solid; m.p. 248-249 °C. <sup>1</sup>H NMR (300 MHz, CDCl<sub>3</sub>, δ ppm): 3.73 (s, 2H), 7.01-7.06 (m, 3H), 7.26-7.33 (m, 2H), 7.43-7.48 (m, 2H), 7.52 (d, *J* = 8.4 Hz, 1H), 7.60 (t, *J* = 8.0 Hz, 1H), 7.71 (td, *J* = 7.5 Hz, 1.5 Hz, 1H), 7.82 (d, *J* = 7.8 Hz, 1H), 8.29-8.36 (m, 3H), 8.51 (s, 1H), 10.28 (d, *J* = 12.6 Hz, 1H); <sup>13</sup>C NMR (75 MHz, CDCl<sub>3</sub>, δ ppm): 20.2, 113.5, 116.1, 118.4, 123.2, 123.3, 123.5, 123.6, 124.5, 125.2, 125.9, 129.3, 129.7, 133.9, 134.1, 140.8, 142.4, 146.9, 148.1, 156.2, 156.7, 179.9, 192.0; HRMS (ESI) calcd for C<sub>25</sub>H<sub>17</sub>N<sub>2</sub>O<sub>5</sub> [M - H]<sup>-</sup> 425.11375; found 425.11430. Anal. Calcd for C<sub>25</sub>H<sub>18</sub>N<sub>2</sub>O<sub>5</sub>: C, 70.42; H, 4.25; N, 6.57. Found: C, 70.34; H, 4.31; N, 6.53.

**General procedure for the isolation of intermediates 4.** A mixture of the suitable enaminone **2** (1 mmol) and aniline **3** (1 mmol) in DMF (5 mL) was heated at 130 °C for 3 h. The reaction progress was monitored by thin-layer chromatography. After completion of the reaction, the solvent was removed and the product was purified by column chromatography using a petroleum ether–ethyl acetate mixture (4:1 v/v) as eluent.

**(E)-3-(4-methoxyphenylamino)-1-(3-nitrophenyl)prop-2-en-1-one:** Isolated yield 0.280 g (94%); Orange solid; m.p. 143-144 °C. <sup>1</sup>H NMR (300 MHz, CDCl<sub>3</sub>, δ ppm): 3.80 (s, 3H), 5.98 (d, *J* = 7.5 Hz, 1H), 6.90 (d, *J* = 8.70 Hz, 2H), 7.08 (d, *J* = 8.70 Hz, 2H), 7.49-7.55 (m, 1H), 7.59-7.65 (m, 1H), 8.22-8.33 (m, 2H), 8.72 (s, 1H), 12.27 (d, *J* = 12.2 Hz, NH); <sup>13</sup>C NMR (75 MHz, CDCl<sub>3</sub>, δ ppm): 55.5, 92.3, 115.1, 118.3, 122.1, 125.5, 129.4, 132.8, 133.2, 140.9, 147.2, 148.4, 156.9, 187.1; Anal. Calcd for C<sub>16</sub>H<sub>14</sub>N<sub>2</sub>O<sub>4</sub>: C, 64.42; H, 4.73; N, 9.39. Found: C, 64.55; H, 4.80; N, 9.50.

**(E)-1-phenyl-3-(phenylamino)prop-2-en-1-one:** Isolated yield 0.201 g (90%); Yellow solid; m.p. 138-139 °C. <sup>1</sup>H NMR (300 MHz, CDCl<sub>3</sub>, δ ppm): 6.02 (d, *J* = 7.8 Hz, 1H), 7.04-7.10 (m, 3H), 7.30-7.36 (m, 2H), 7.41-7.47 (m, 2H), 7.49-7.54 (m, 2H), 7.88-7.95 (m, 2H),



12.15 (d,  $J = 11.9$  Hz, NH);  $^{13}\text{C}$  NMR (75 MHz,  $\text{CDCl}_3$ ,  $\delta$  ppm): 93.7, 116.3, 123.6, 127.3, 128.3, 128.4, 129.7, 131.5, 131.6, 139.2, 139.3, 140.2, 140.3, 144.9, 191.0; Anal. Calcd for  $\text{C}_{15}\text{H}_{13}\text{NO}$ : C, 80.69; H, 5.87; N, 6.27. Found: C, 80.78; H, 5.83; N, 6.16.

## 2. X-Ray data for compound 5h (CCDC number 894829)

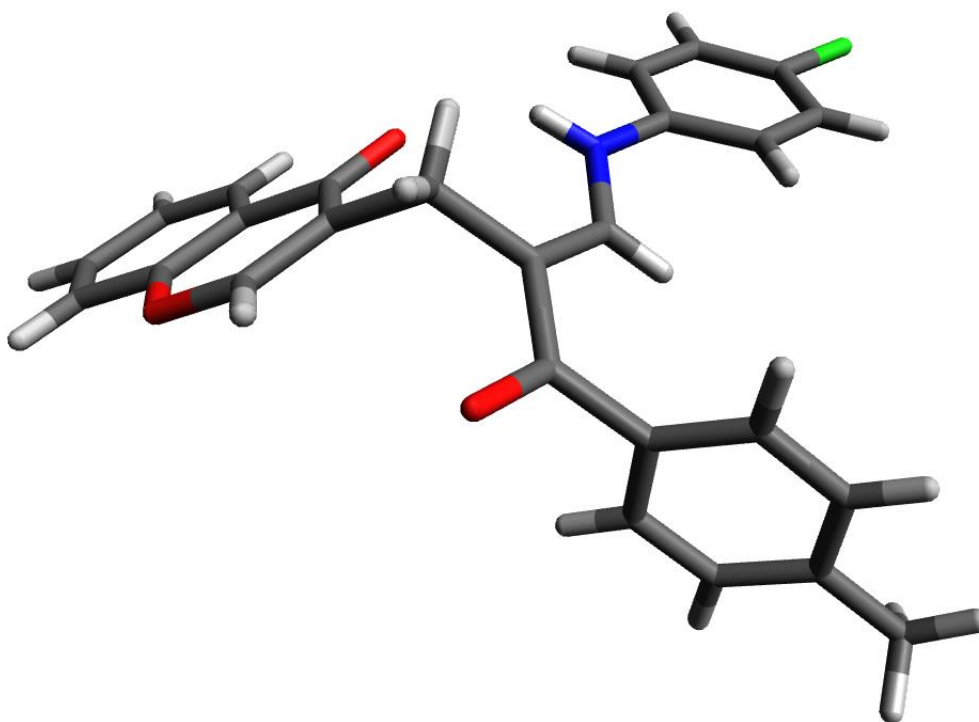

Single Crystal X-Ray structure of compound **5h**

---

### Crystal data of **5h**

---

|                                      |                                                                                                                                       |
|--------------------------------------|---------------------------------------------------------------------------------------------------------------------------------------|
| Empirical formula                    | $\text{C}_{26}\text{H}_{20}\text{ClN}_4\text{O}_3$                                                                                    |
| Formula weight                       | 42988                                                                                                                                 |
| Temperature                          | 298(2) K                                                                                                                              |
| Wavelength                           | 0.71073 Å                                                                                                                             |
| Crystal system                       | Monoclinic                                                                                                                            |
| Space group                          | P 21/n                                                                                                                                |
| Unit cell dimensions                 | $a = 13.2215(15)$ Å $\alpha = 90^\circ$ .<br>$b = 7.2887(8)$ Å $\beta = 94.734(2)^\circ$ .<br>$c = 21.964(3)$ Å $\gamma = 90^\circ$ . |
| Volume                               | $2109.4(4)$ Å <sup>3</sup>                                                                                                            |
| Z                                    | 4                                                                                                                                     |
| Density (calculated)                 | $1.354$ kg/m <sup>3</sup>                                                                                                             |
| Absorption coefficient               | $0.210$ mm <sup>-1</sup>                                                                                                              |
| F(000)                               | 896                                                                                                                                   |
| Crystal size                         | $0.24 \times 0.22 \times 0.17$ mm <sup>3</sup>                                                                                        |
| Theta range for data collection      | 2.0 to $25.0^\circ$ .                                                                                                                 |
| Index ranges                         | $-17 \leq h \leq 17$ , $-9 \leq k \leq 9$ , $-28 \leq l \leq 28$                                                                      |
| Reflections collected/ unique        | 23517/ 5204 [R(int) = 0.0305]                                                                                                         |
| Completeness to theta = $25.0^\circ$ | 100 %                                                                                                                                 |

Absorption correction  
Refinement method  
Data / restraints / parameters  
Goodness-of-fit on F2  
Final R indices [ $I > 2\sigma(I)$ ]  
R indices (all data)  
Largest diff. peak and hole

Psi scan  
Full-matrix least-squares on F2  
5036 / 0 / 280  
1.055  
R1 = 0.0747, wR2 = 0.0538  
R1 = 0.1593, wR2 = 0.1454  
0.252 and -0.256 e.Å<sup>-3</sup>

### 3. NMR assignments of compound **5h**

The <sup>1</sup>H NMR spectrum of **5h** gives a singlet at 3.70 ppm for the methylenic hydrogens (1-CH<sub>2</sub>), which show a C,H-COSY correlation with the carbon signal at 20.4 ppm. These hydrogens also show HMBCs with C-2', C-3', C-4', C-1'', C-2 and C-3 at 156.3, 123.7, 179.9, 195.2, 114.4 and 145.3 ppm respectively. The singlet at 8.51 ppm assignable to H-2' shows (i) a C,H-COSY correlation with the carbon signal at 156.3 ppm and (ii) HMBCs with C-1, C-3' and C-4' at 20.4, 123.7 and 179.9 ppm respectively. The NH hydrogen appears as a doublet at 10.4 ppm ( $J = 12.3$  Hz).

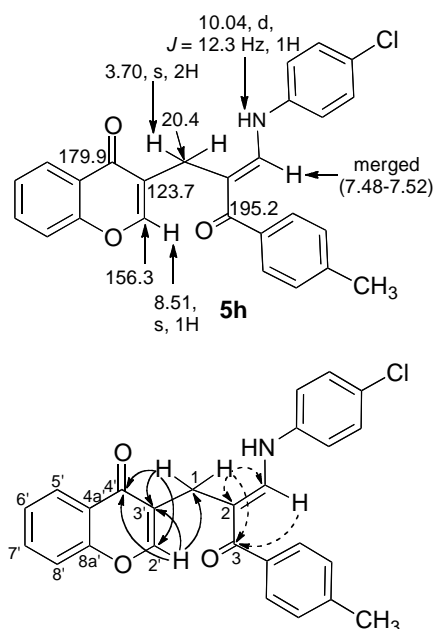

Selected <sup>1</sup>H and <sup>13</sup>C chemical shifts and HMBC correlations of **5h**

#### 4. Copies of spectra

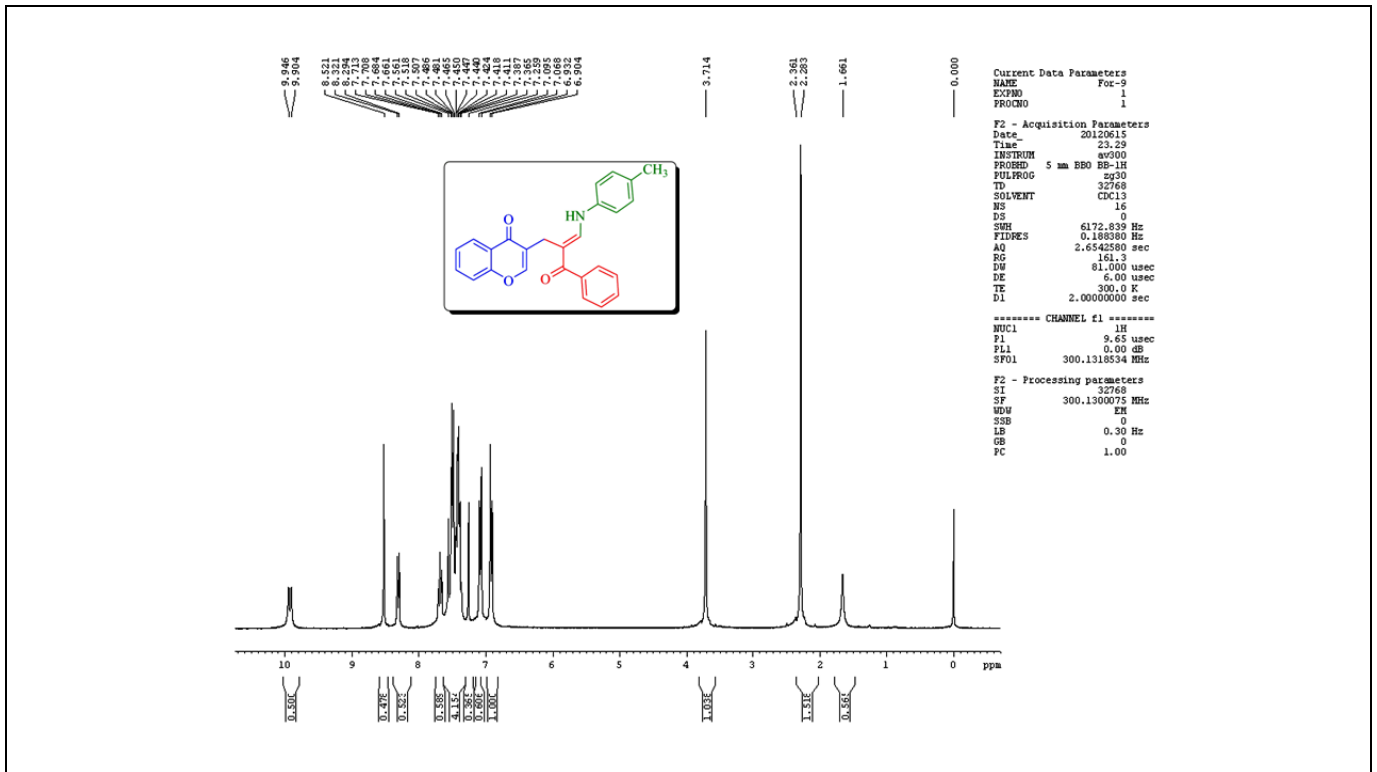

Figure 1. <sup>1</sup>H NMR Spectrum of 5a (CDCl<sub>3</sub>)

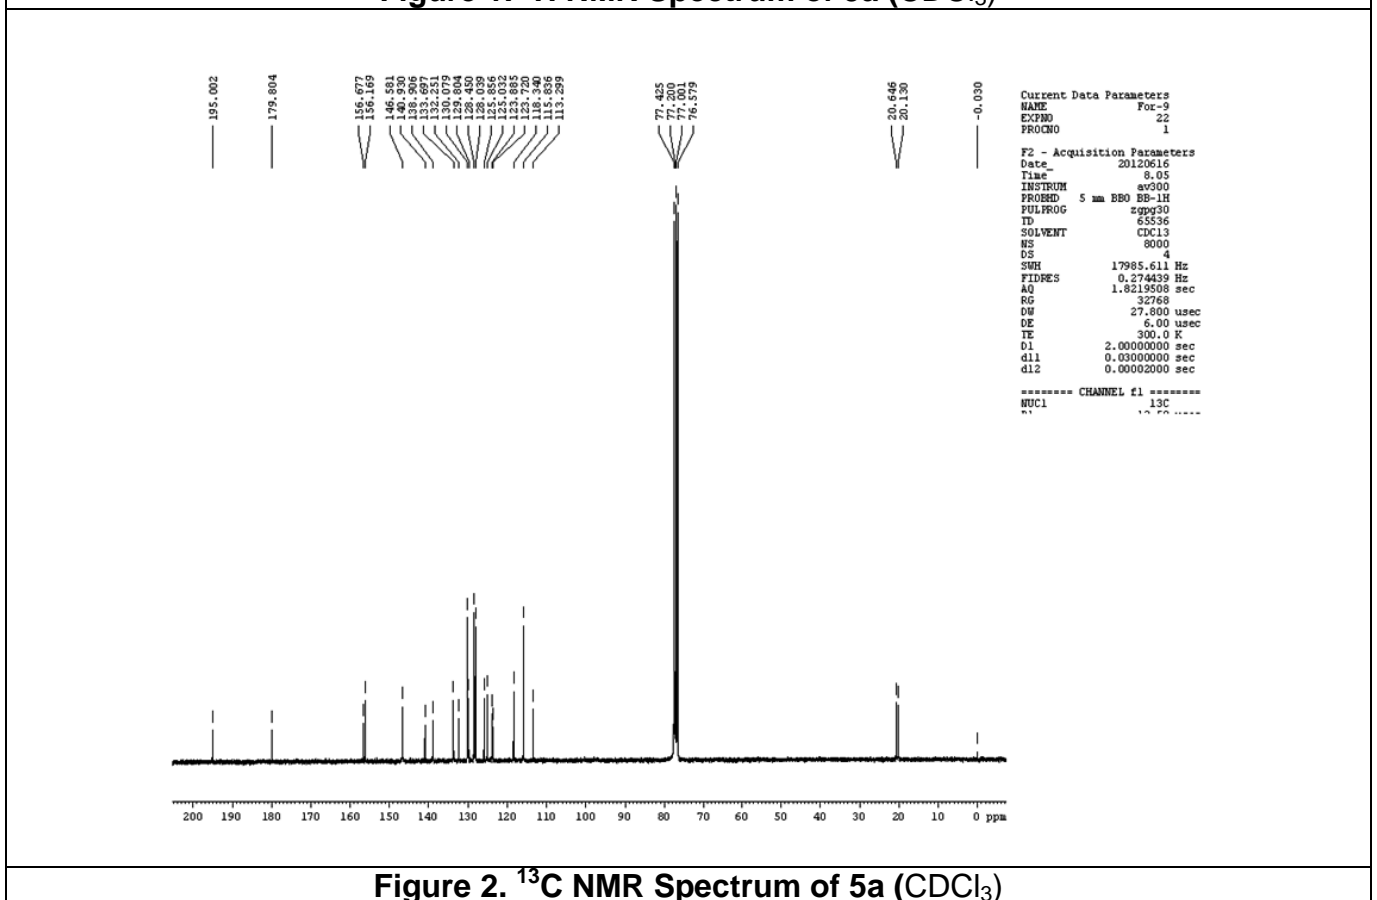

Figure 2. <sup>13</sup>C NMR Spectrum of 5a (CDCl<sub>3</sub>)

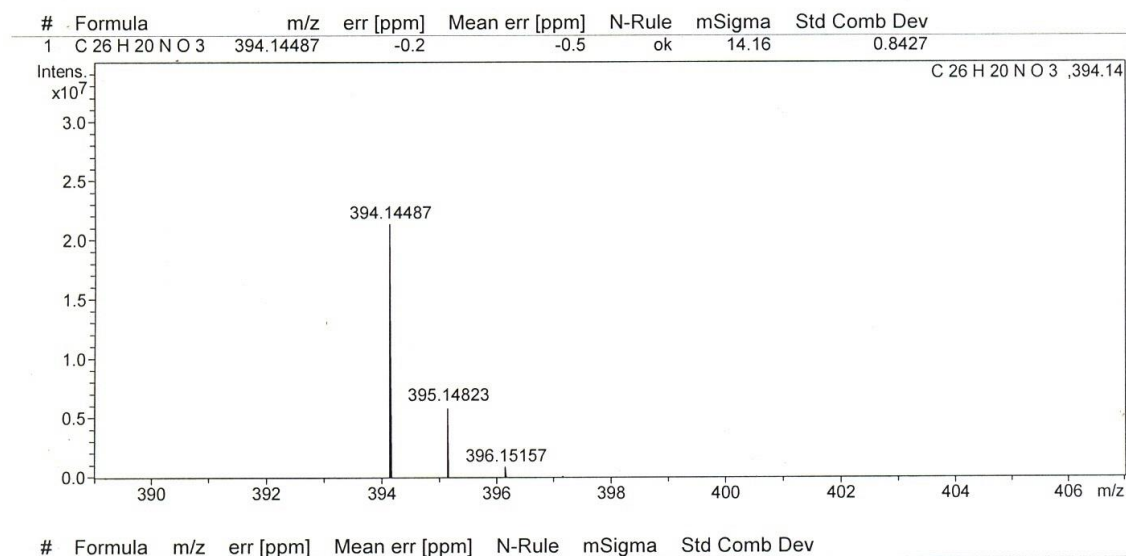

Figure 3. HRMS measurement for 5a

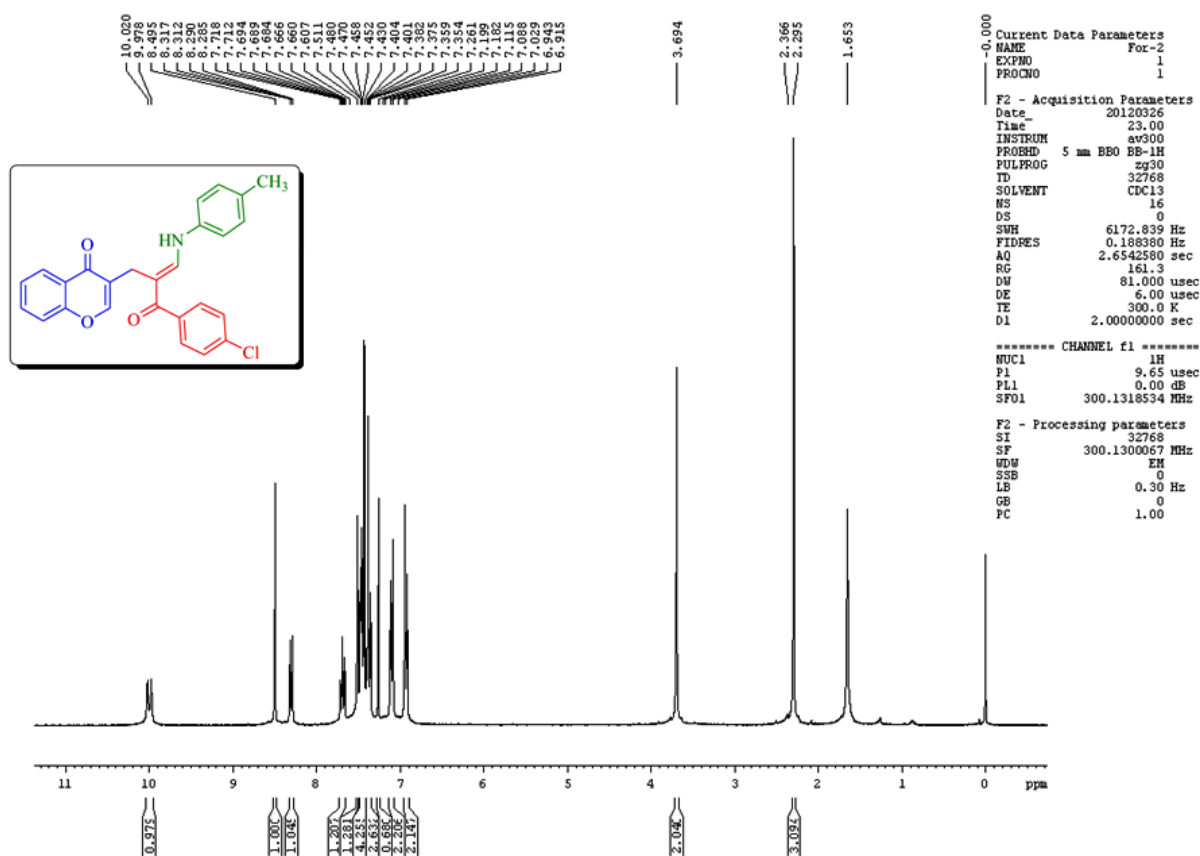

Figure 4. <sup>1</sup>H NMR Spectrum of 5b (CDCl<sub>3</sub>)

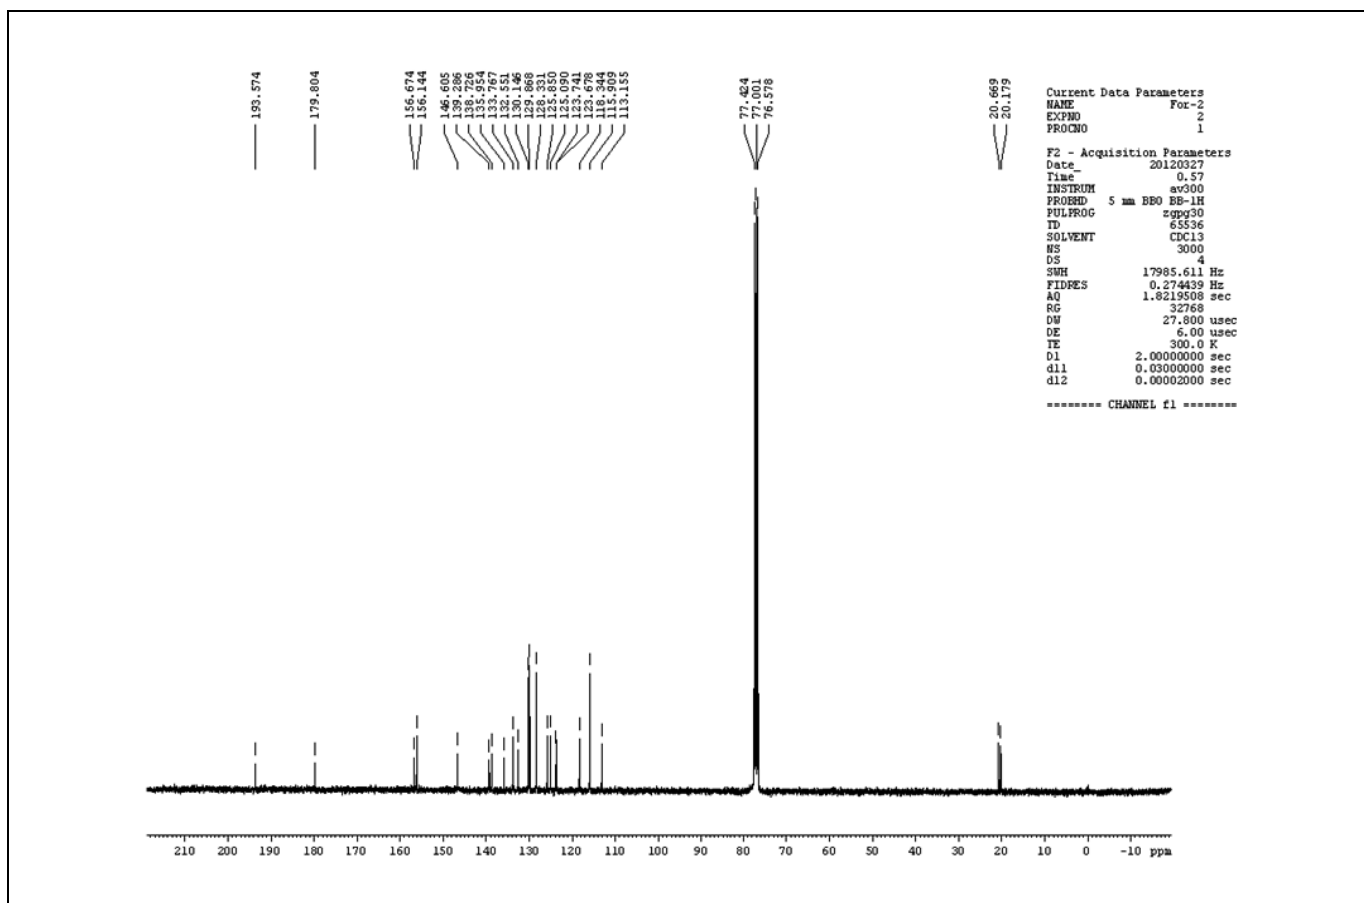

Figure 5. <sup>13</sup>C NMR Spectrum of 5b (CDCl<sub>3</sub>)

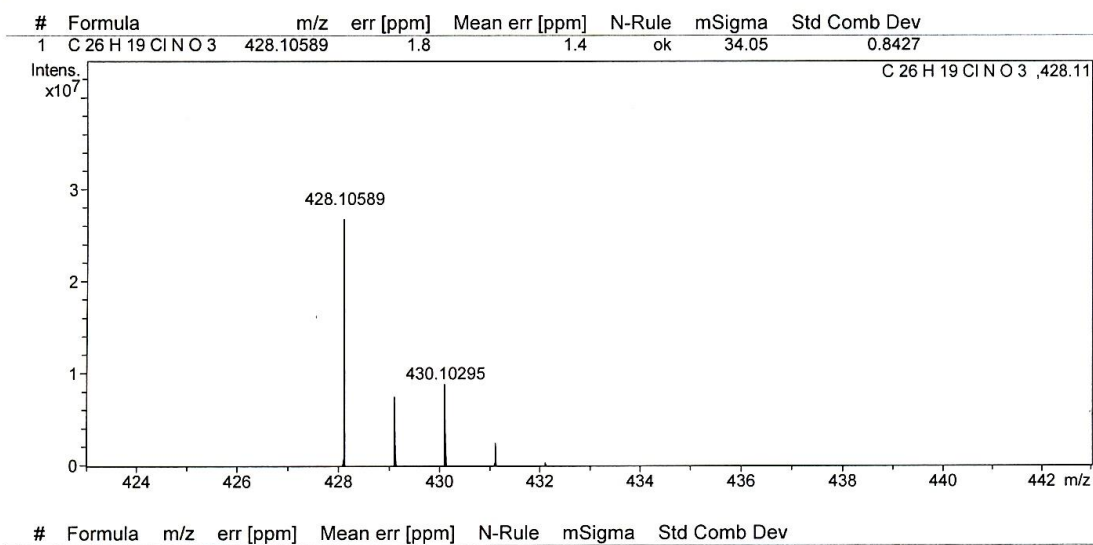

Figure 6. HRMS measurement for 5b

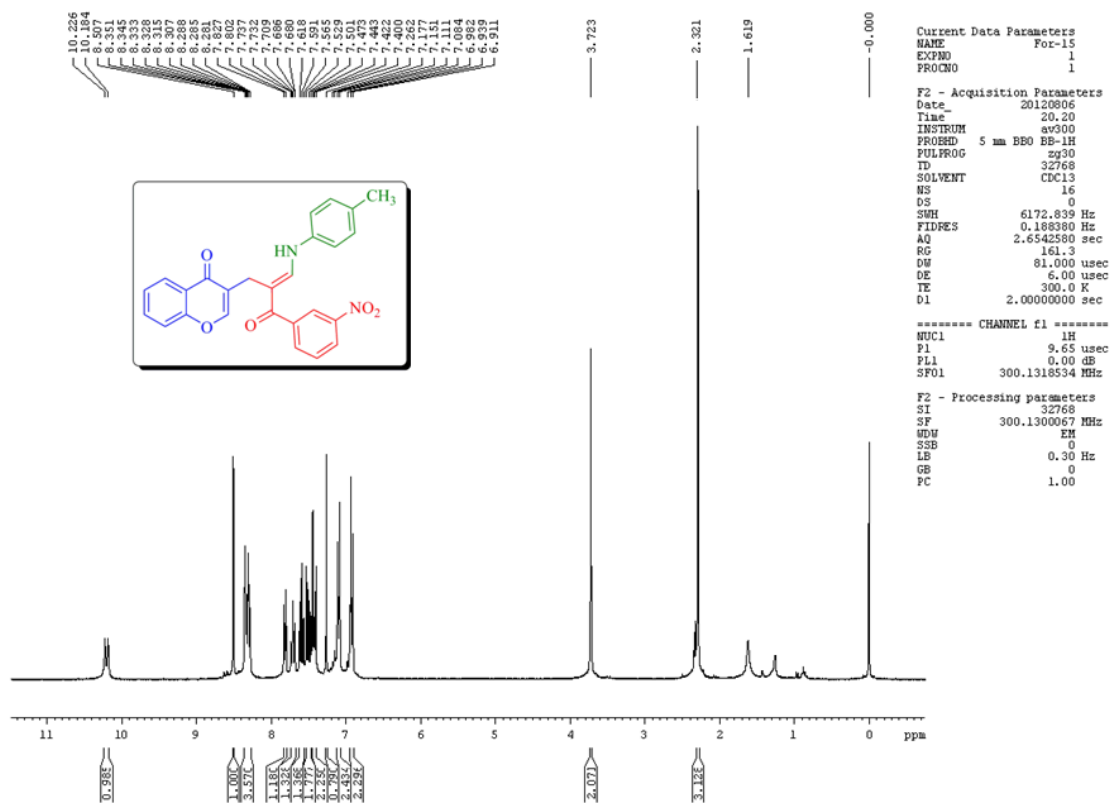

Figure 7.  $^1\text{H}$  NMR Spectrum of 5c ( $\text{CDCl}_3$ )

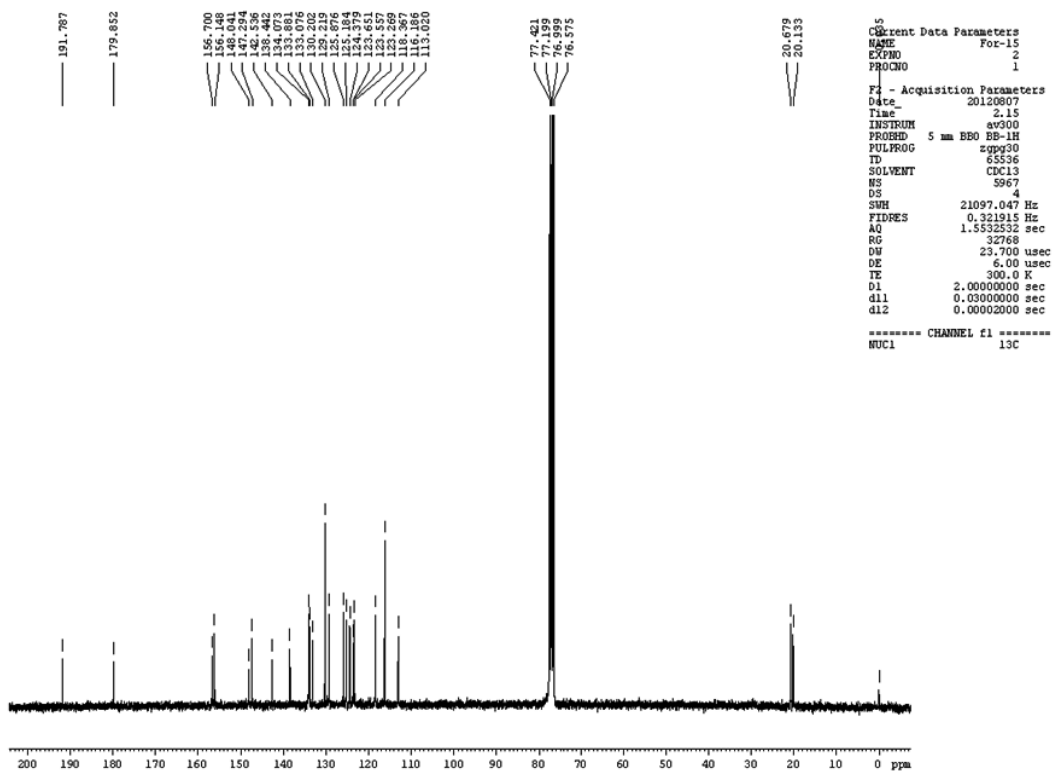

Figure 8.  $^{13}\text{C}$  NMR Spectrum of 5c ( $\text{CDCl}_3$ )

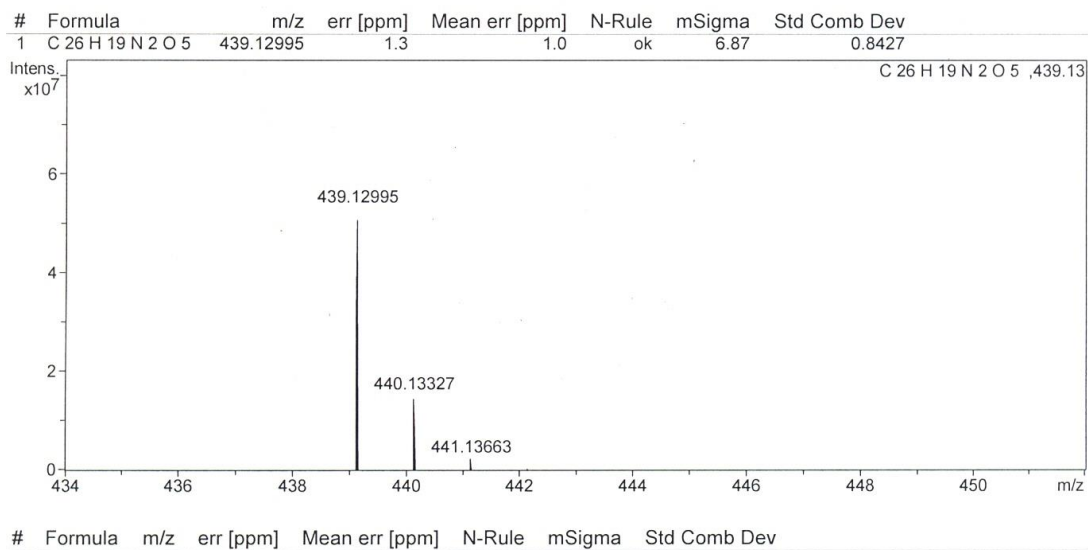

Figure 9. HRMS measurement for 5c

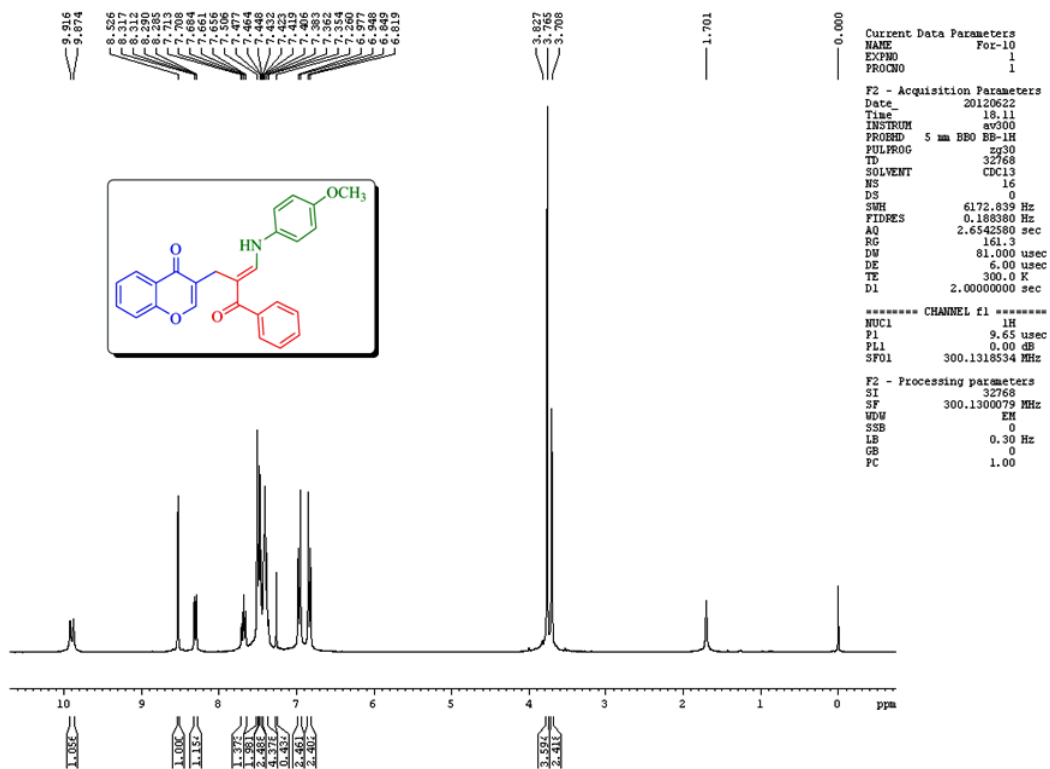

Figure 10. <sup>1</sup>H NMR Spectrum of 5d (CDCl<sub>3</sub>)

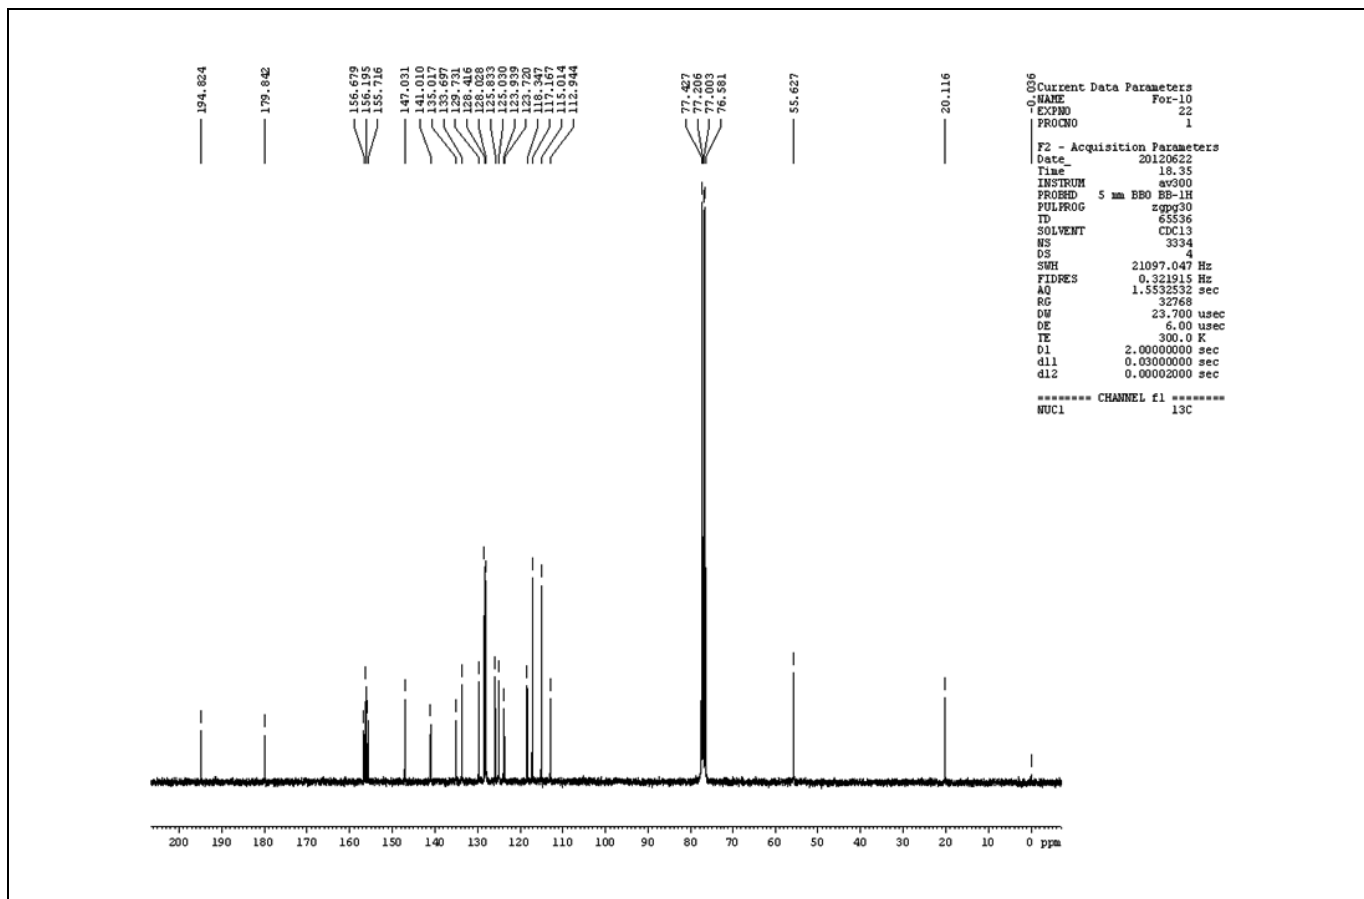

Figure 11. <sup>13</sup>C NMR Spectrum of 5d (CDCl<sub>3</sub>)

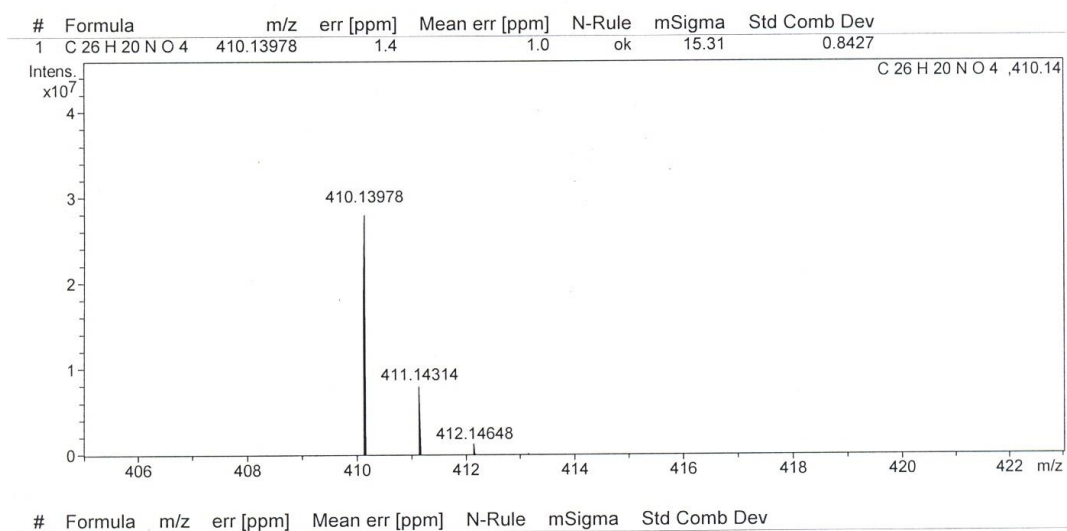

Figure 12. HRMS measurement for 5d



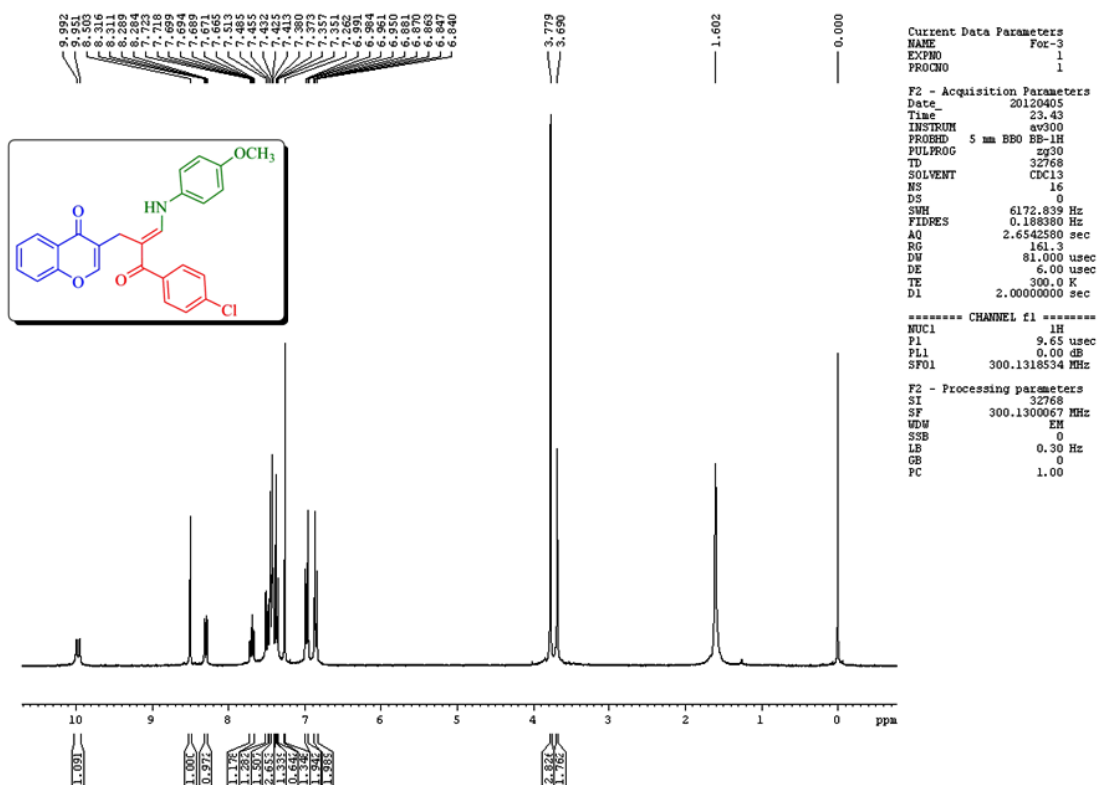

Figure 13. <sup>1</sup>H NMR Spectrum of 5e (CDCl<sub>3</sub>)

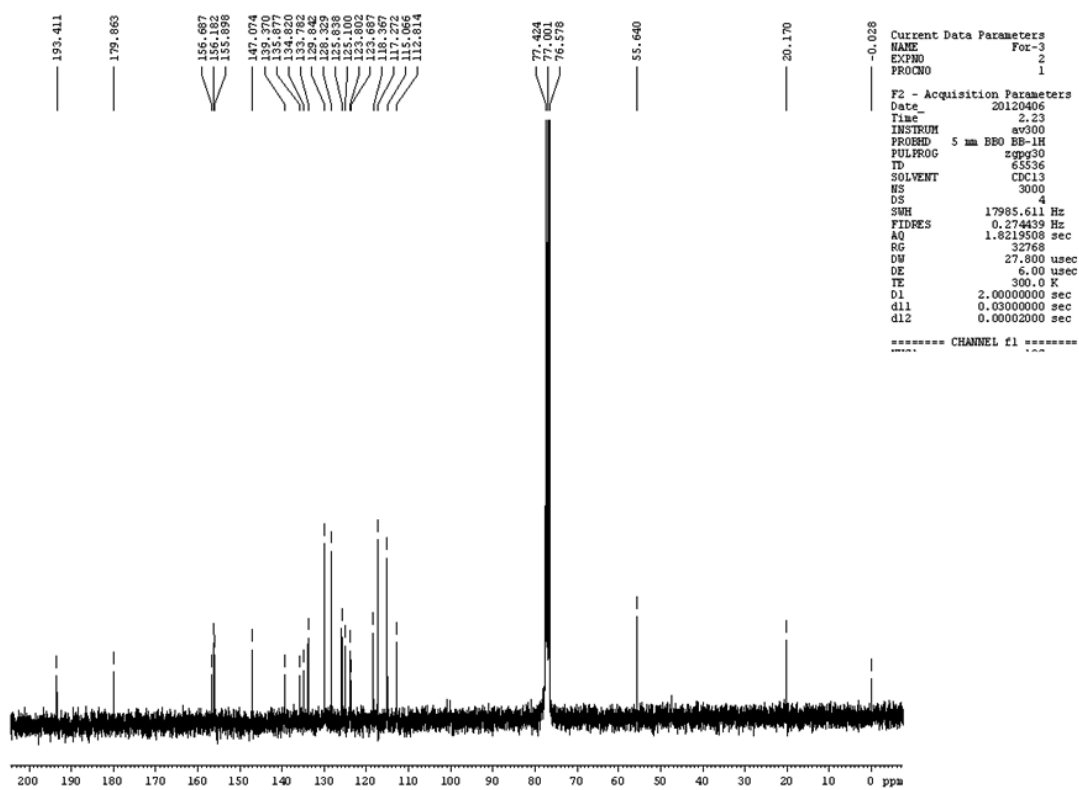

Figure 14. <sup>13</sup>C NMR Spectrum of 5e (CDCl<sub>3</sub>)

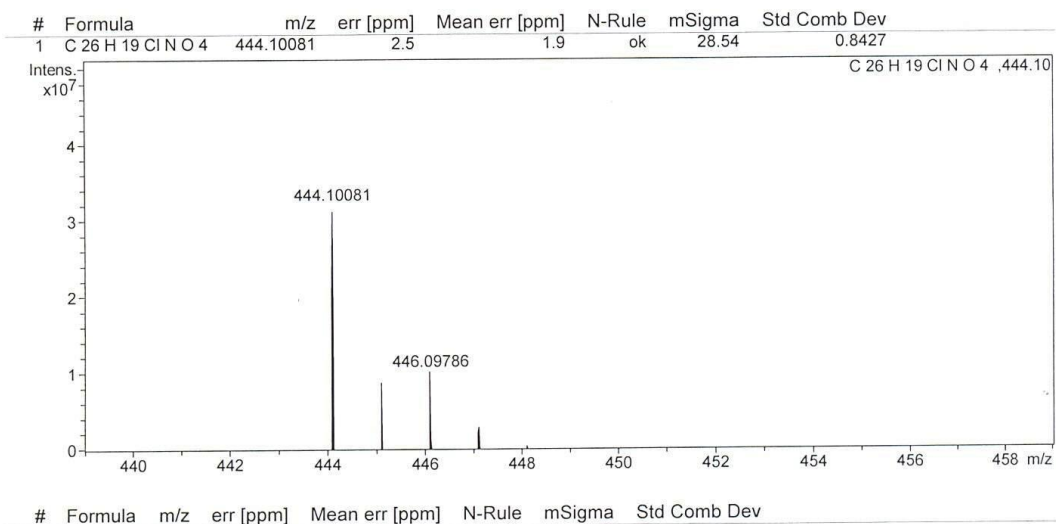

Figure 15. HRMS measurement for 5e

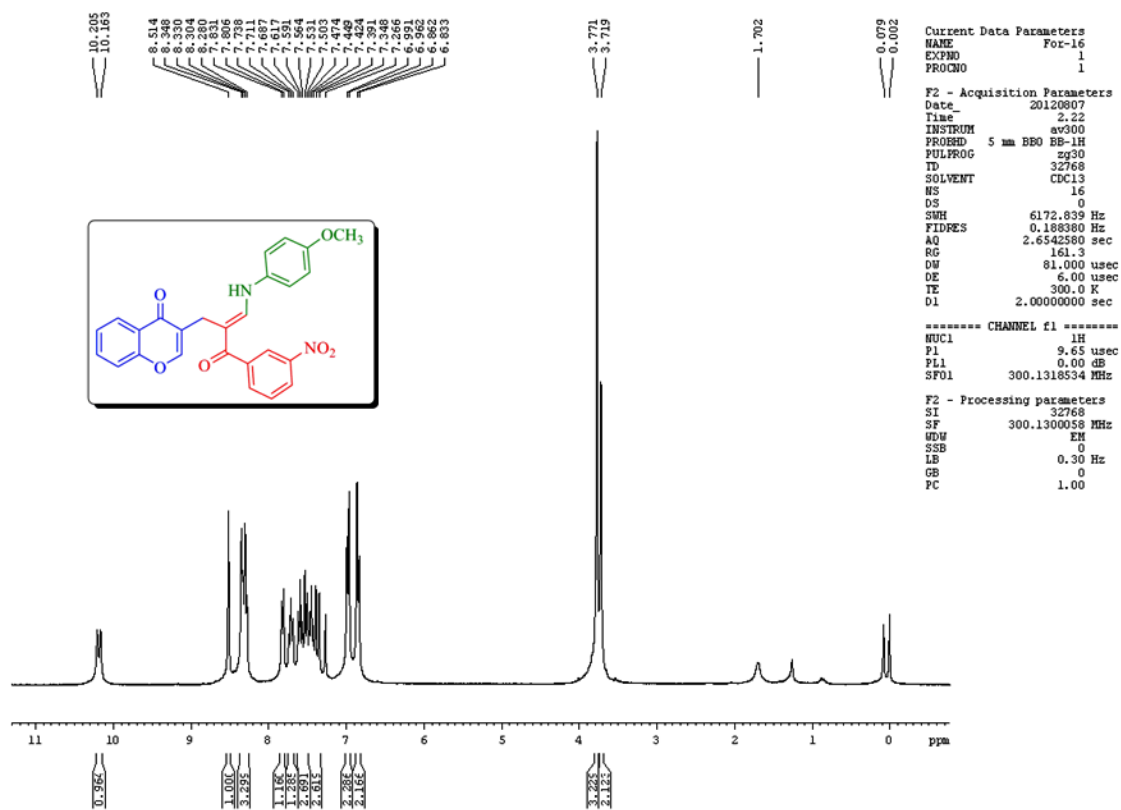

Figure 16. <sup>1</sup>H NMR Spectrum of 5f (CDCl<sub>3</sub>)

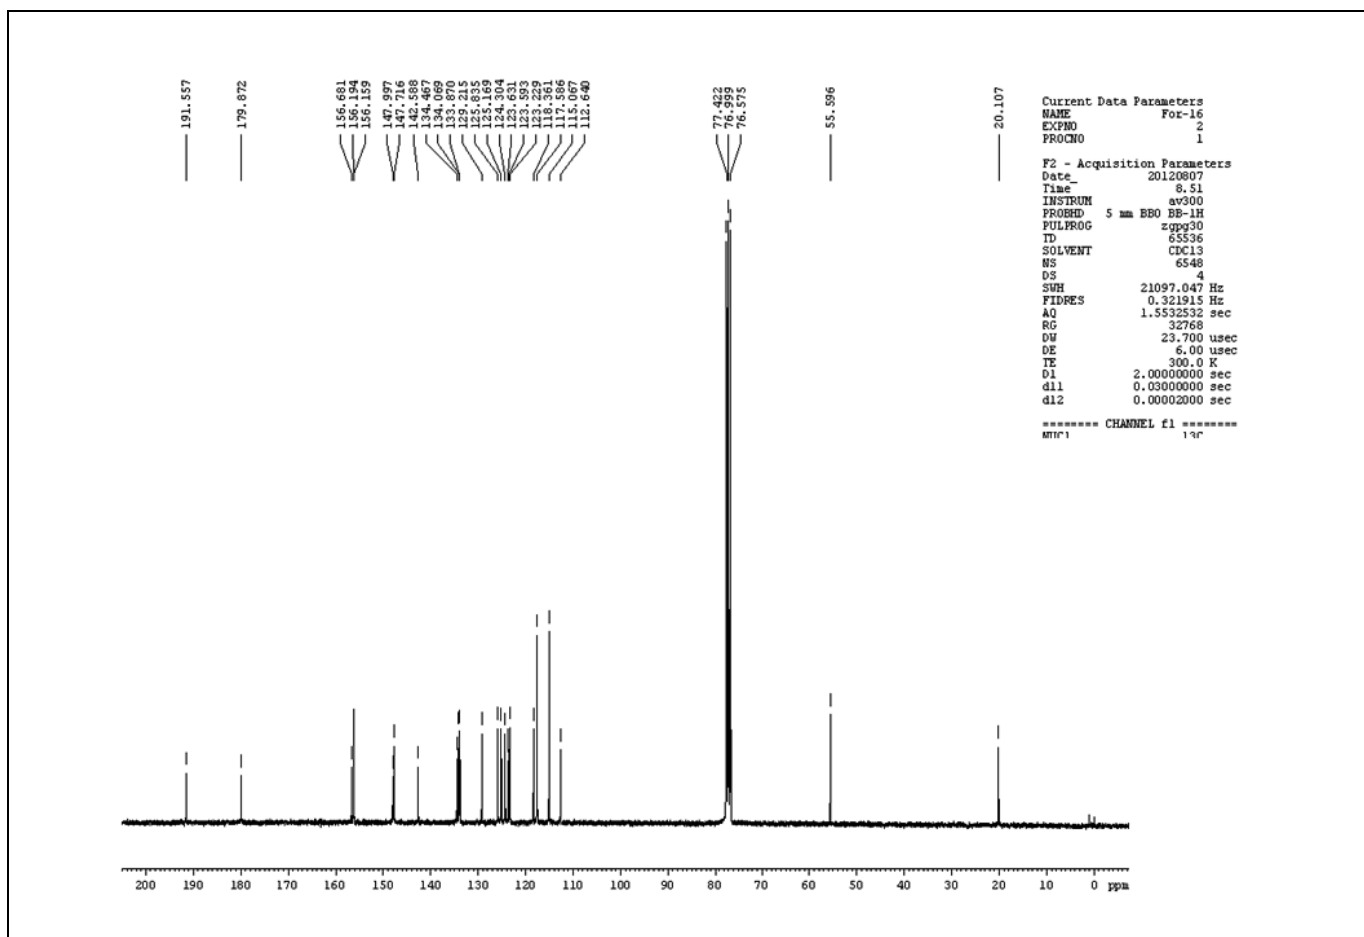

Figure 17. <sup>13</sup>C NMR Spectrum of 5f (CDCl<sub>3</sub>)

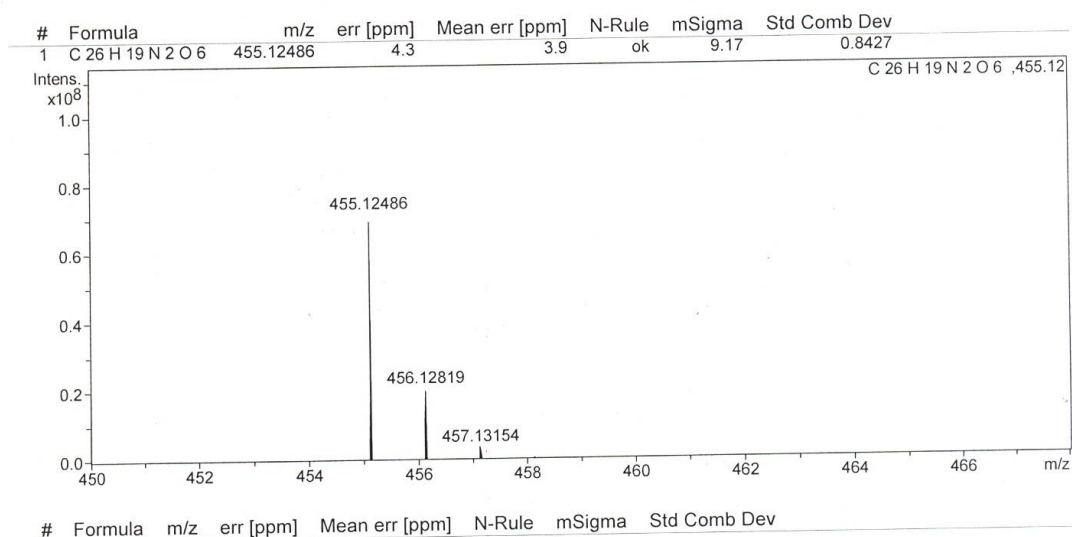

Figure 18. HRMS measurement for 5f

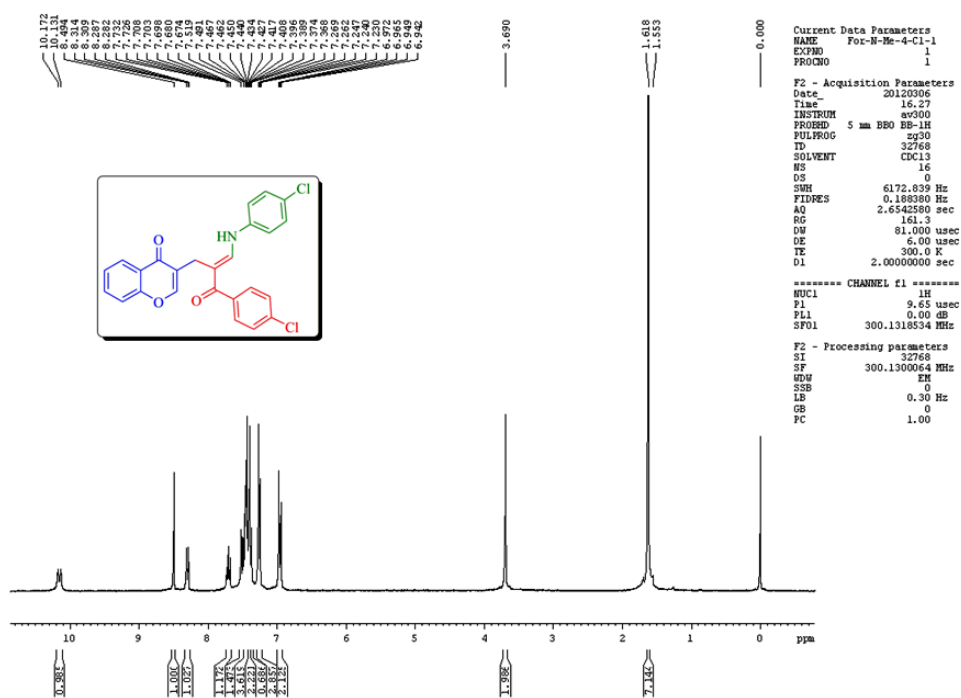

Figure 19. <sup>1</sup>H NMR Spectrum of 5g (CDCl<sub>3</sub>)

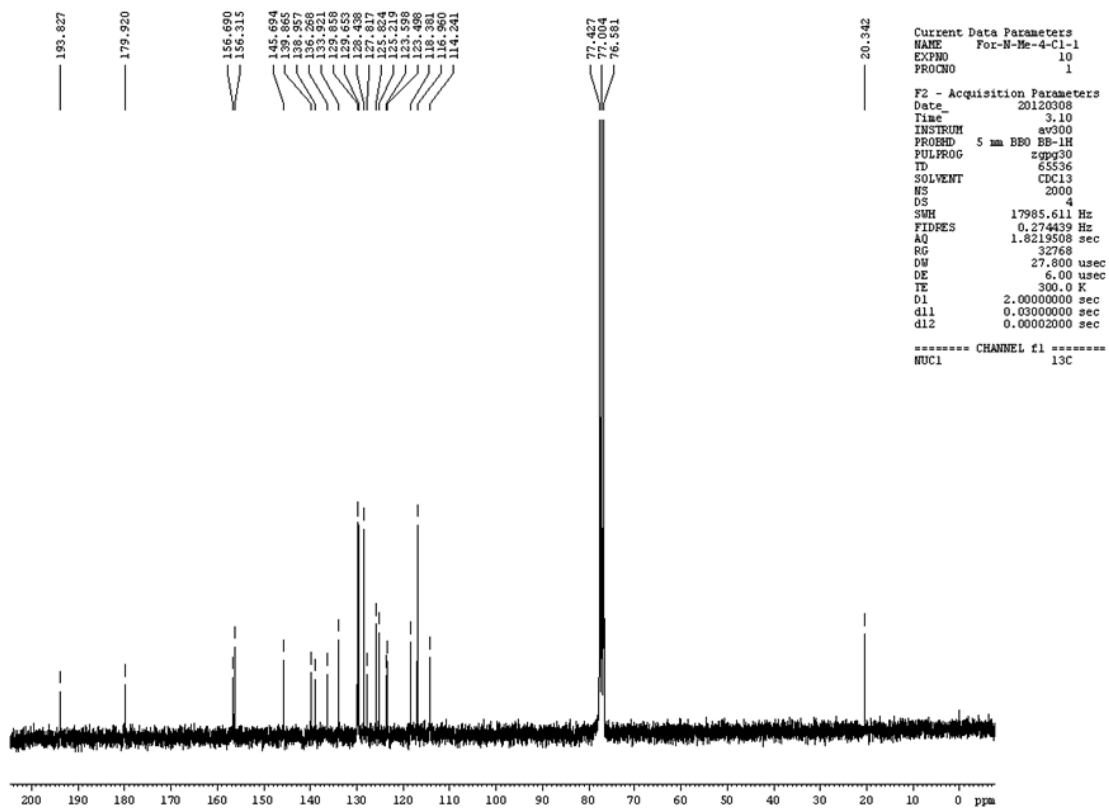

Figure 20. <sup>13</sup>C NMR Spectrum of 5g (CDCl<sub>3</sub>)

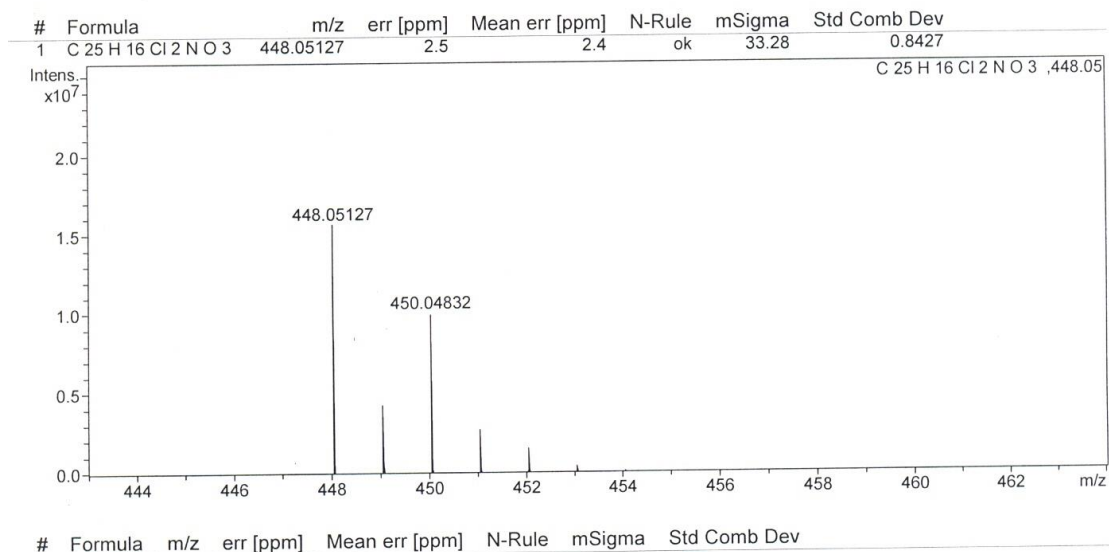

Figure 21. HRMS measurement for 5g

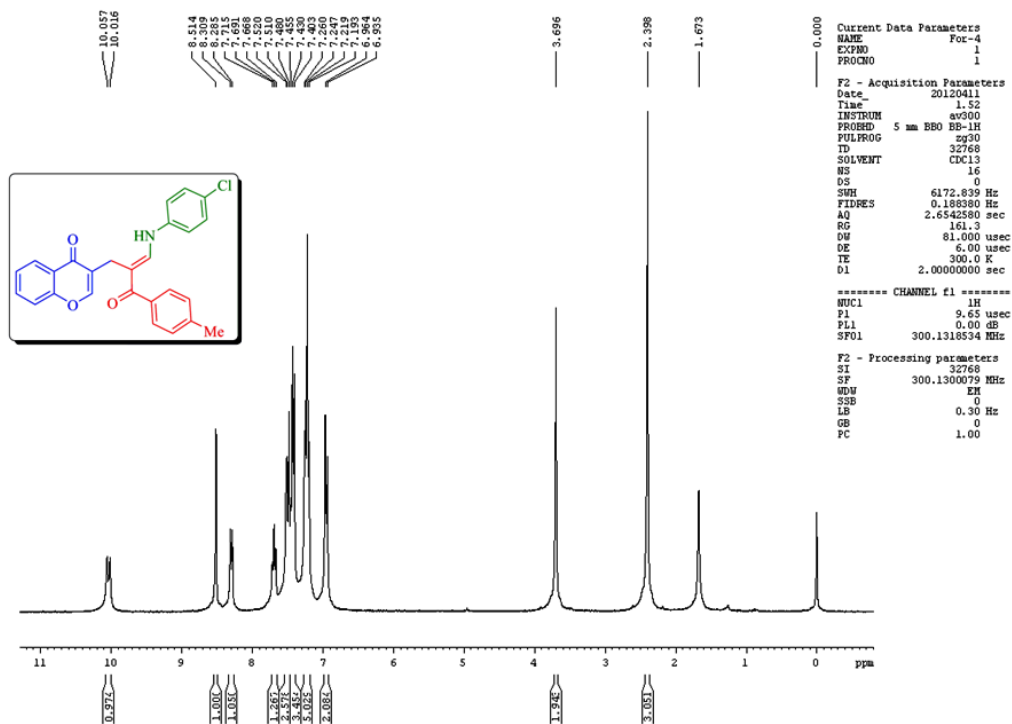

Figure 22. <sup>1</sup>H NMR Spectrum of 5h (CDCl<sub>3</sub>)

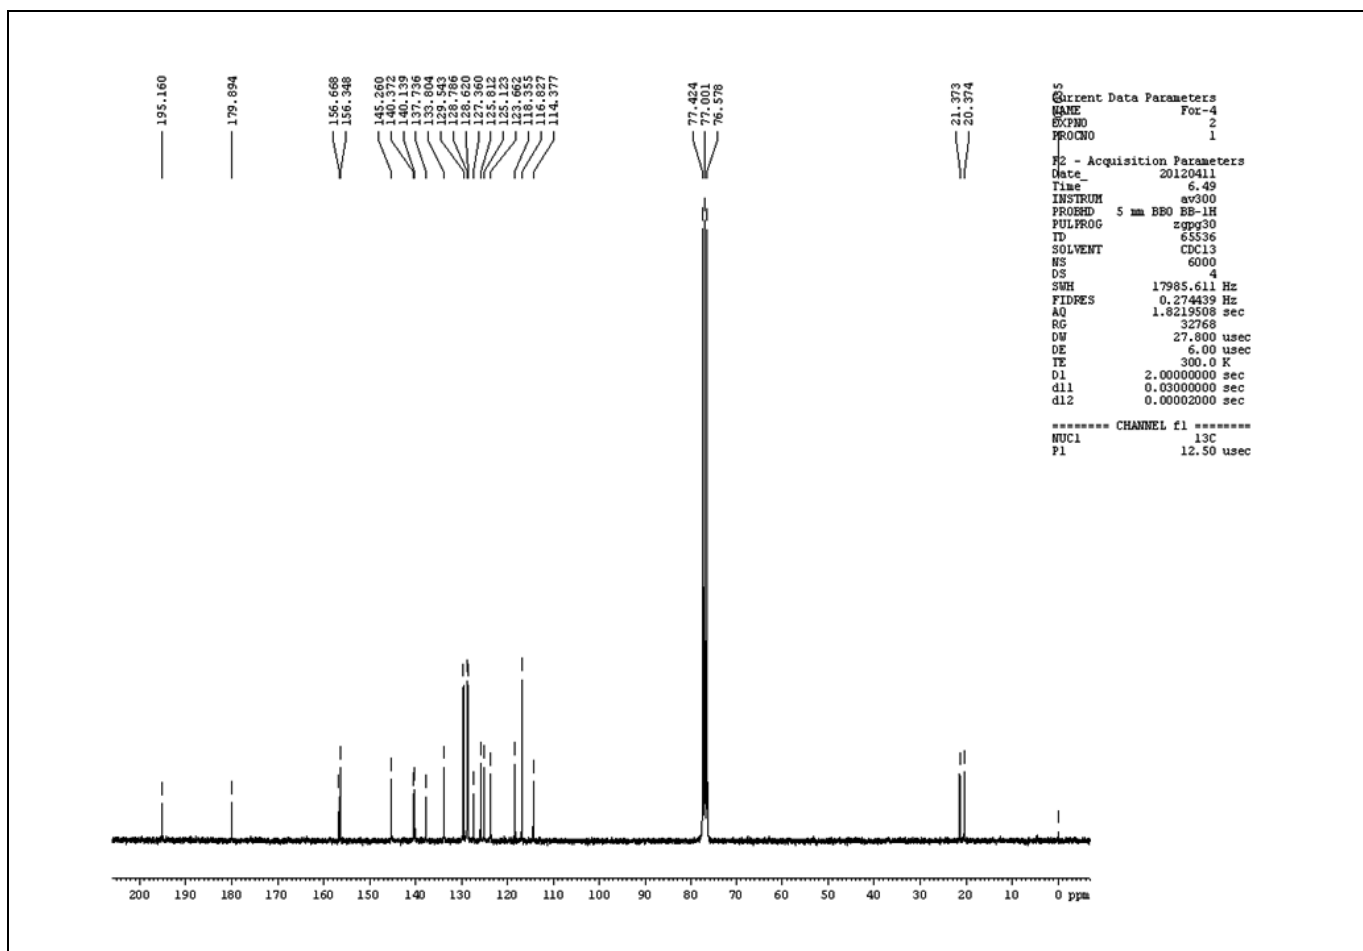

Figure 23. <sup>13</sup>C NMR Spectrum of 5h (CDCl<sub>3</sub>)

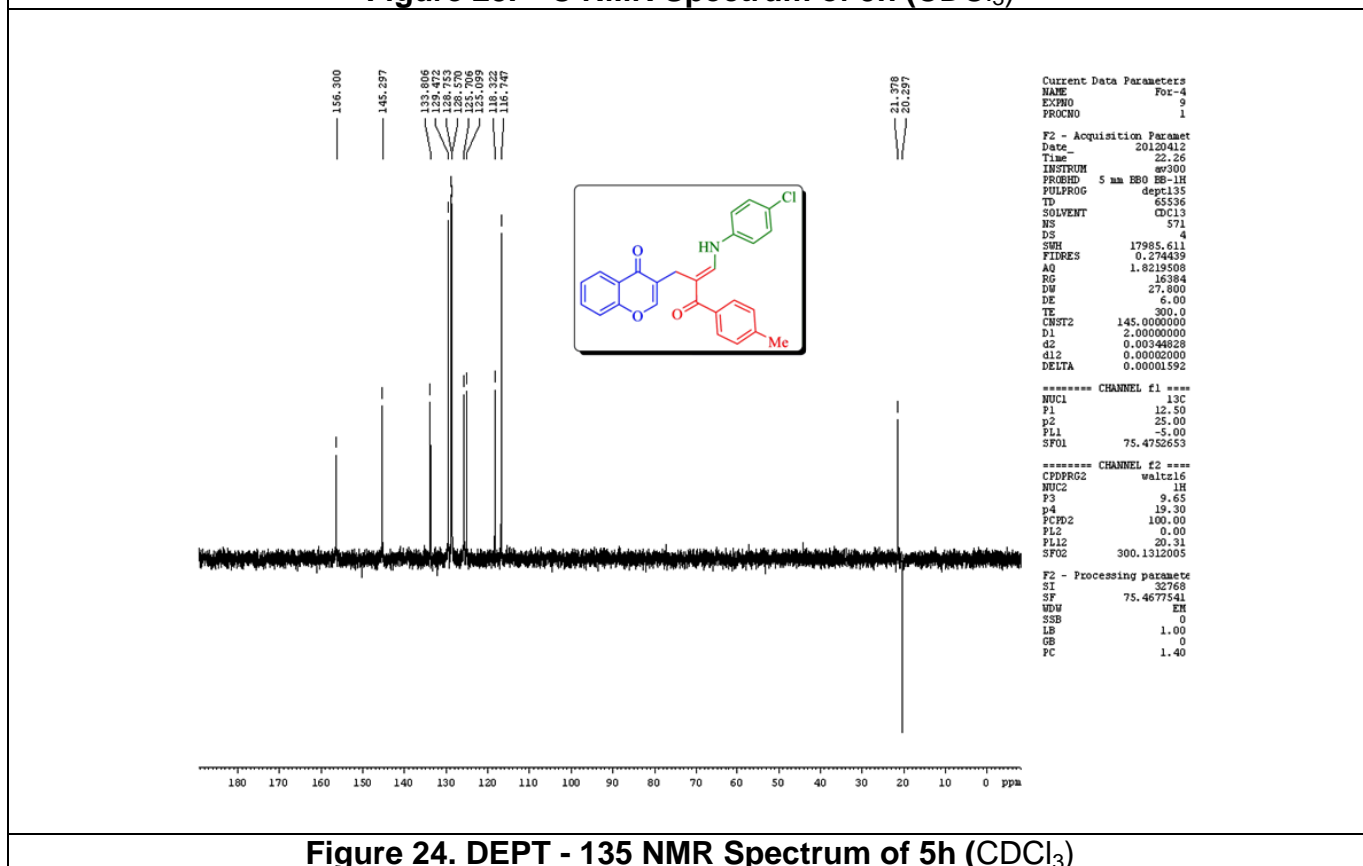

Figure 24. DEPT - 135 NMR Spectrum of 5h (CDCl<sub>3</sub>)

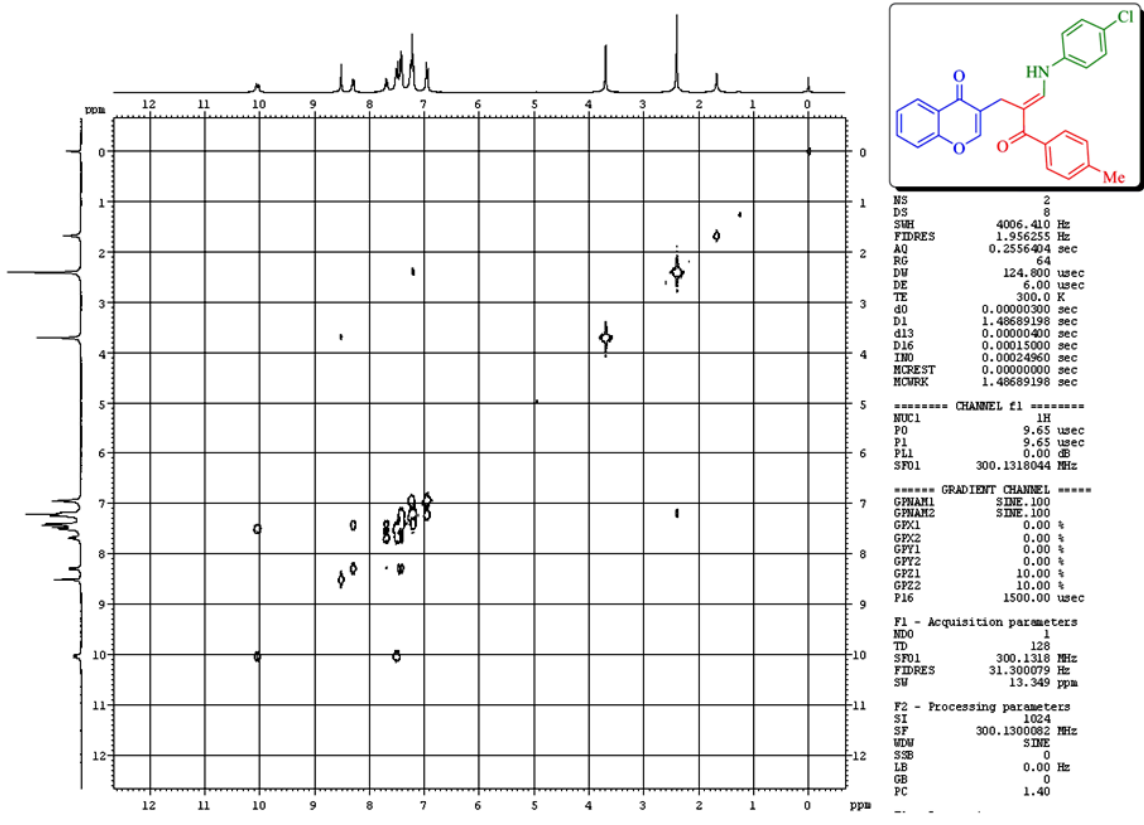

Figure 25. H,H-COSY Spectrum of 5h (CDCl<sub>3</sub>)

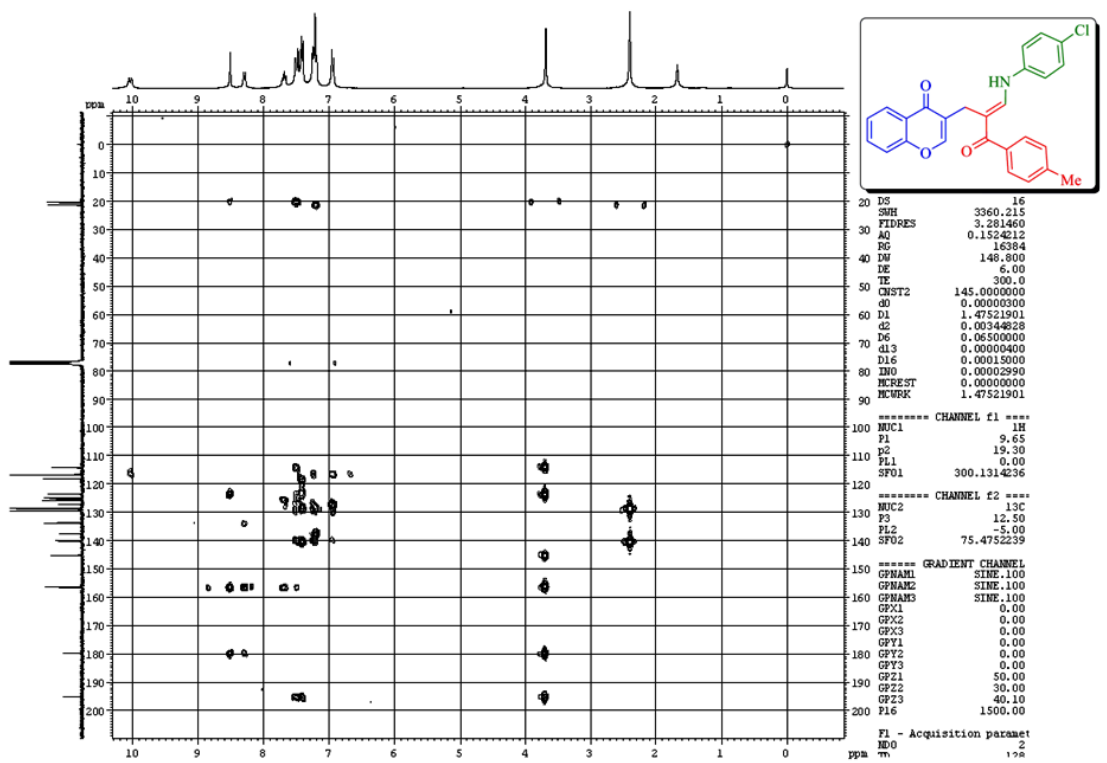

Figure 26. HMBC Spectrum of 5h (CDCl<sub>3</sub>)

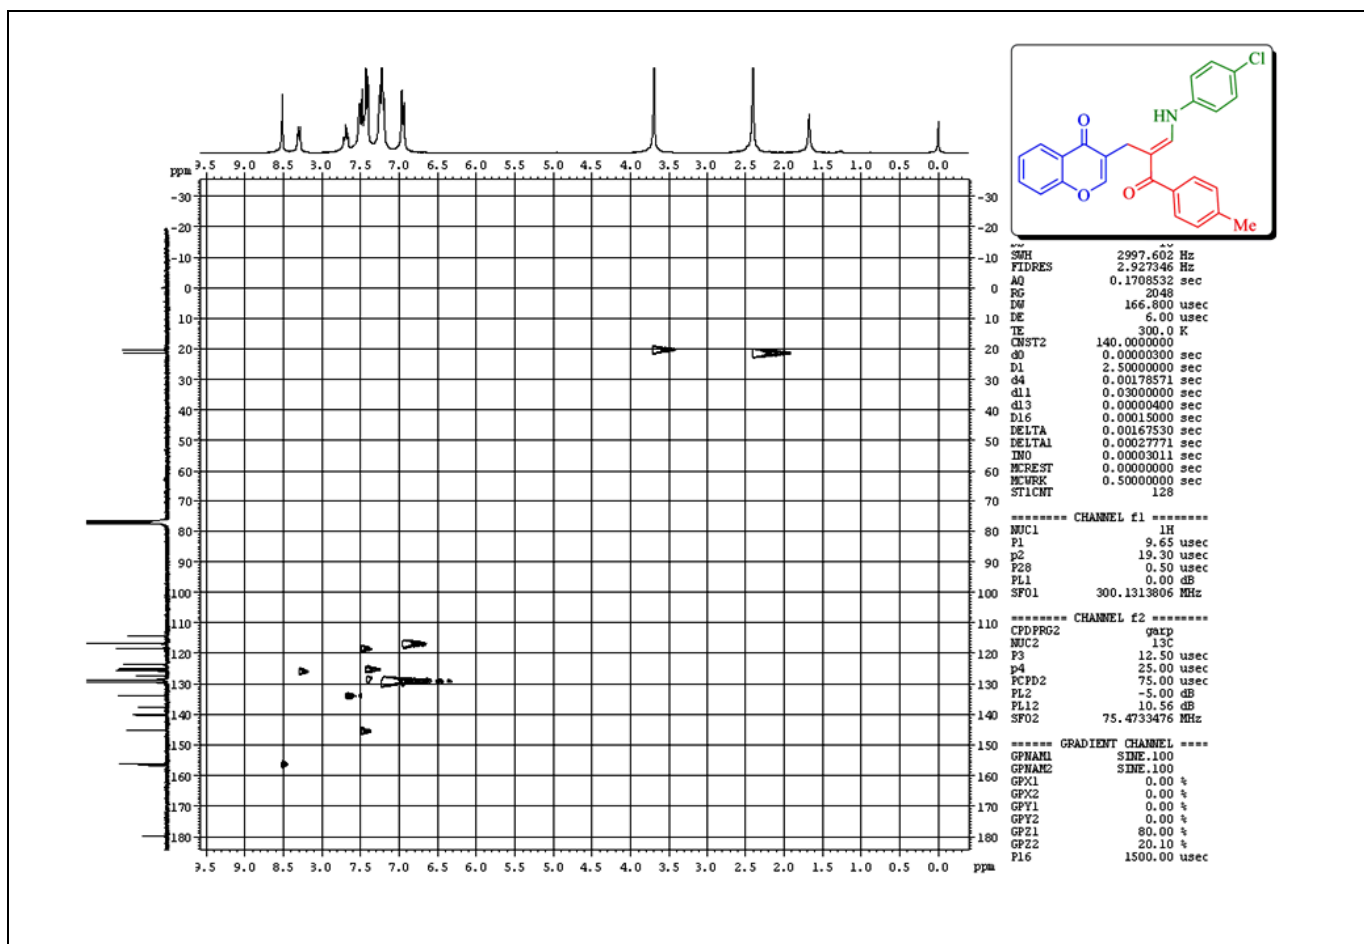

Figure 27. C,H-COSY Spectrum of 5h (CDCl<sub>3</sub>)

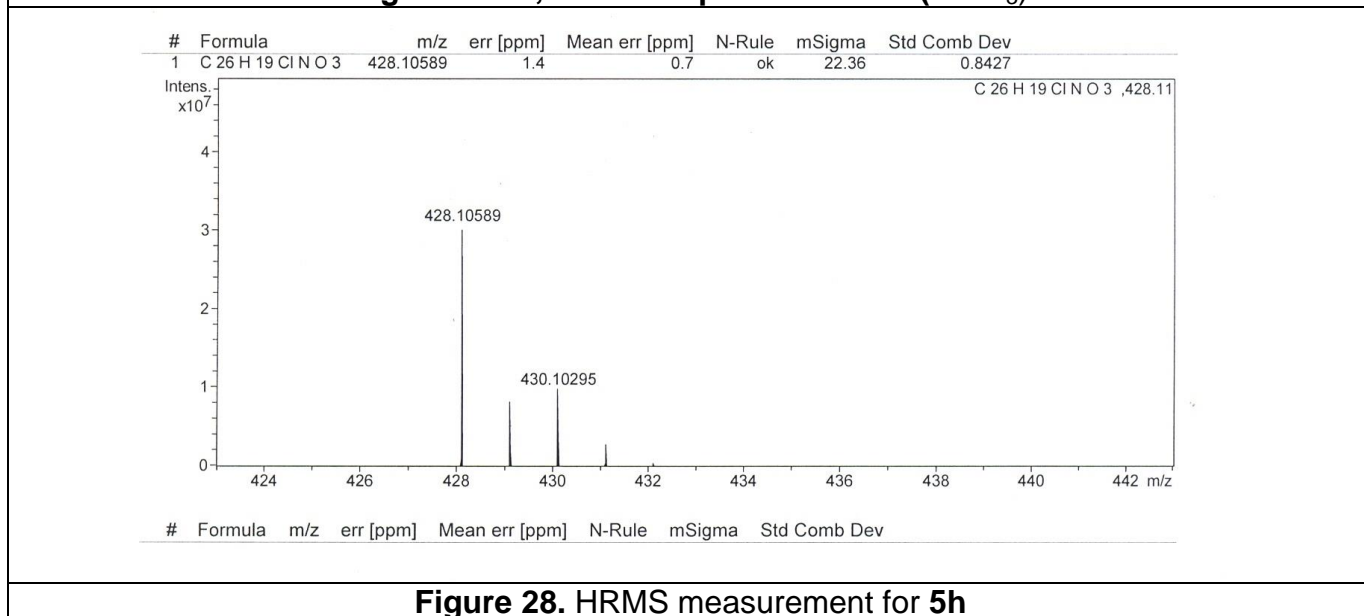

Figure 28. HRMS measurement for 5h



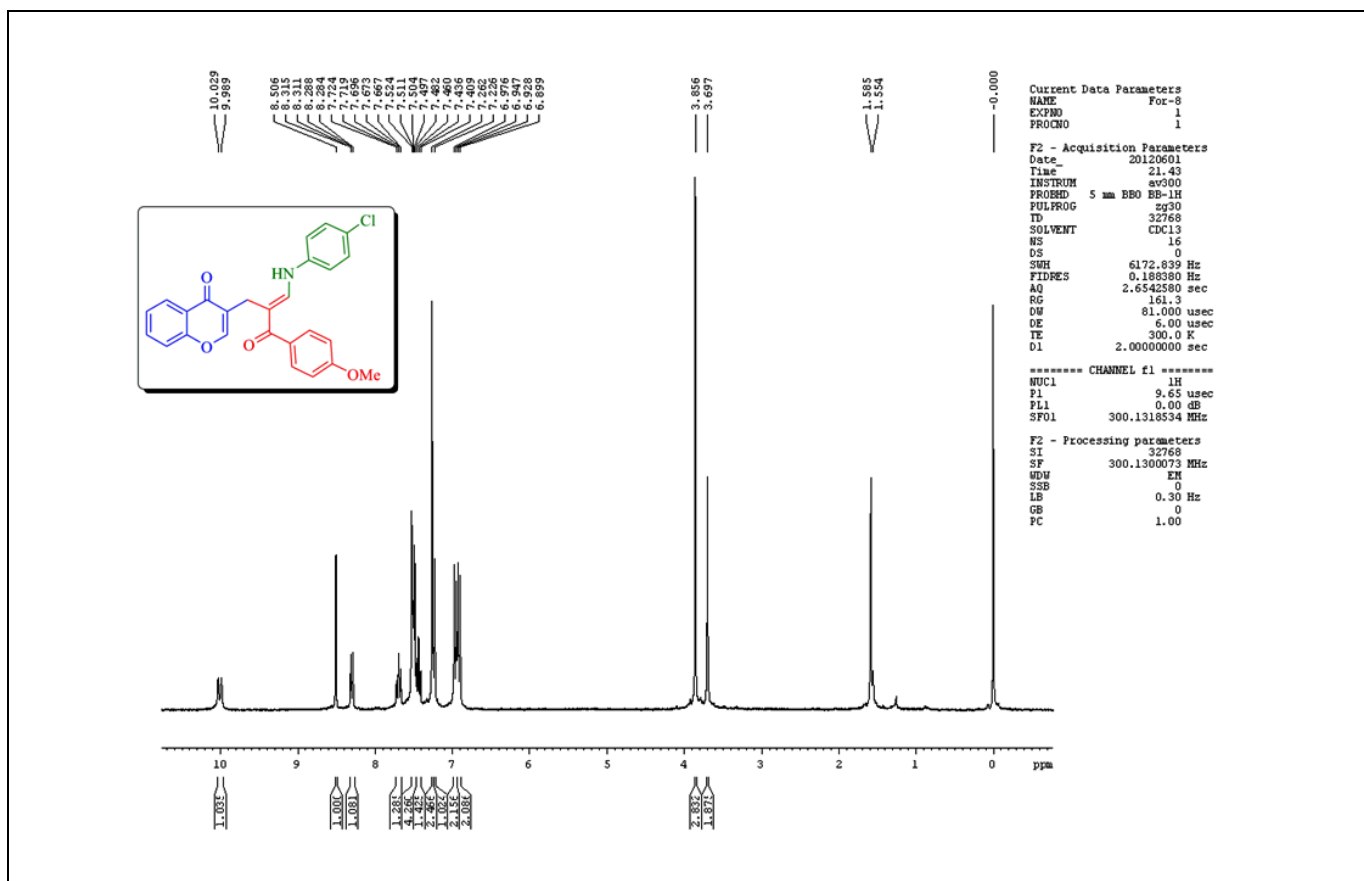

Figure 29. <sup>1</sup>H NMR Spectrum of 5i (CDCl<sub>3</sub>)

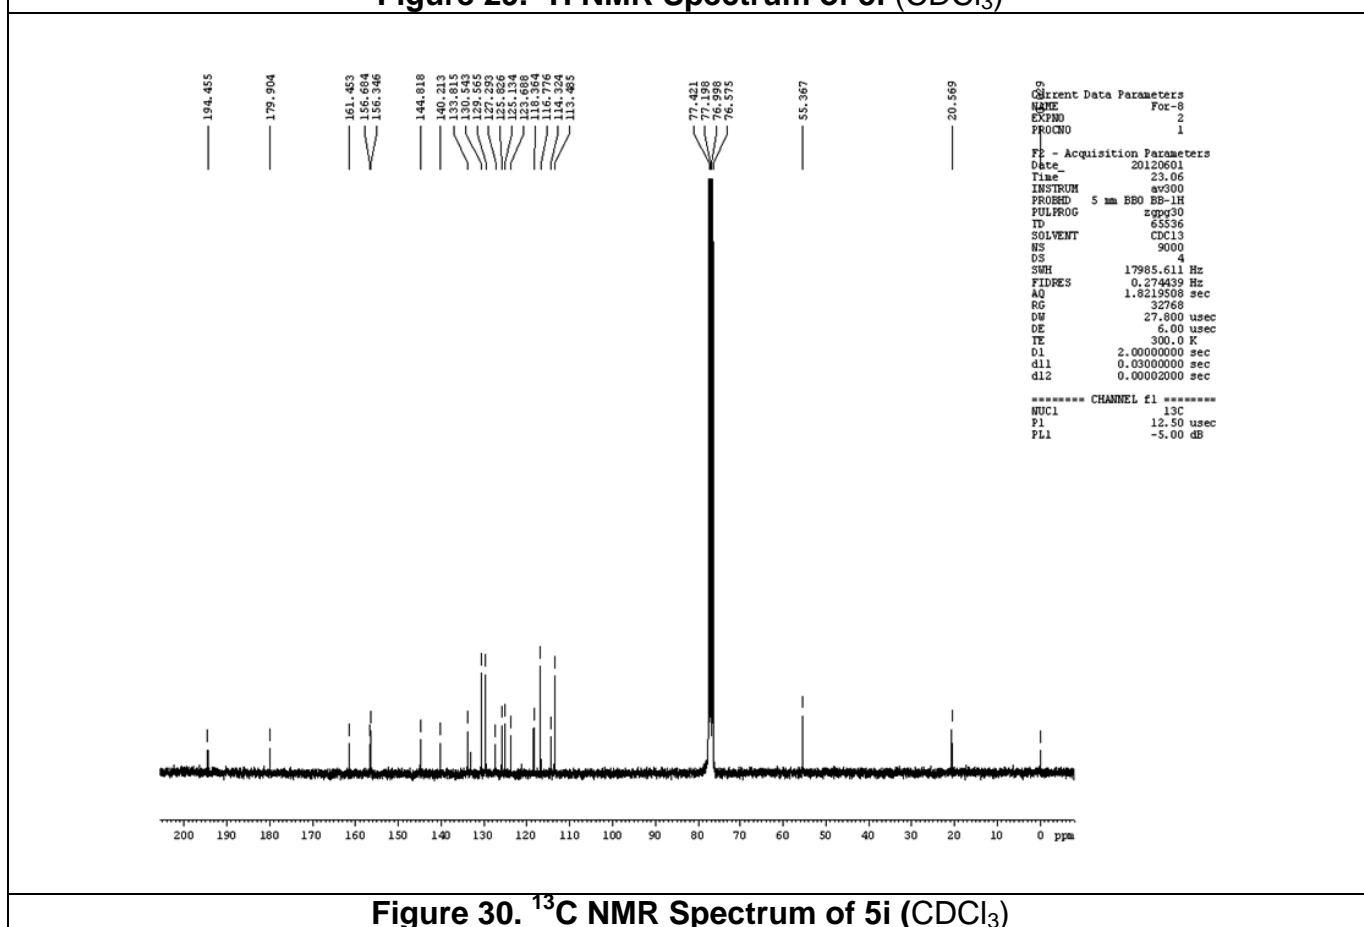

Figure 30. <sup>13</sup>C NMR Spectrum of 5i (CDCl<sub>3</sub>)

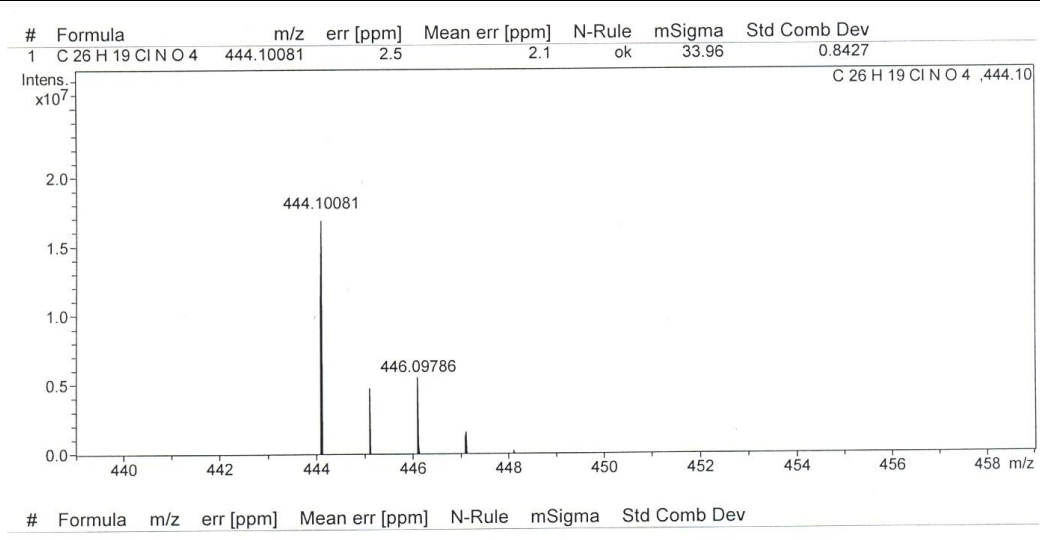

**Figure 31. HRMS measurement for 5i**

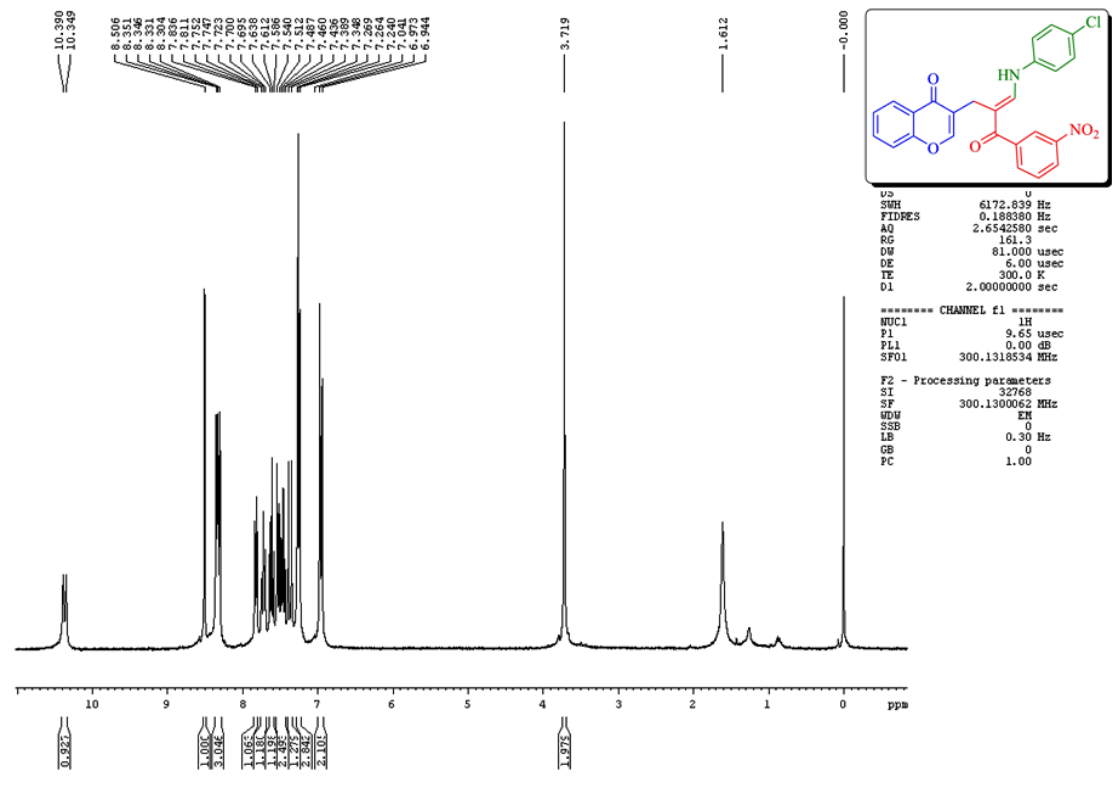

**Figure 32. <sup>1</sup>H NMR Spectrum of 5j (CDCl<sub>3</sub>)**

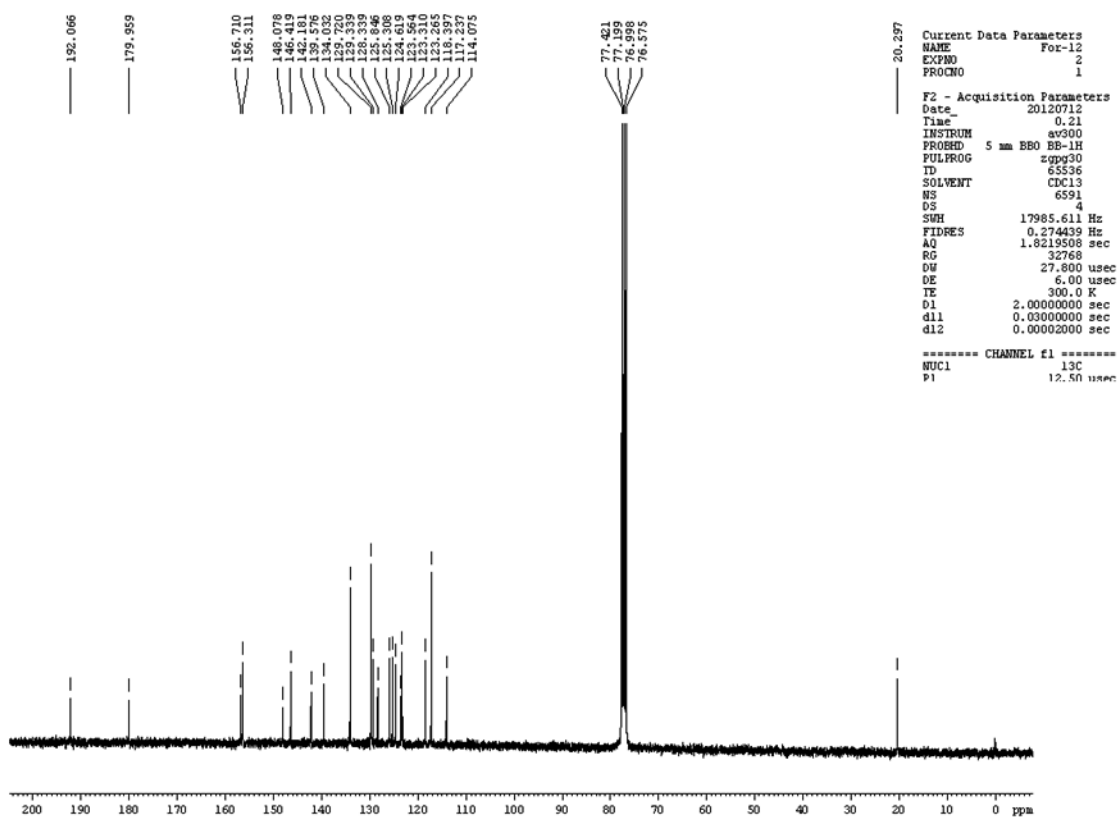

Figure 33. <sup>13</sup>C NMR Spectrum of 5j (CDCl<sub>3</sub>)

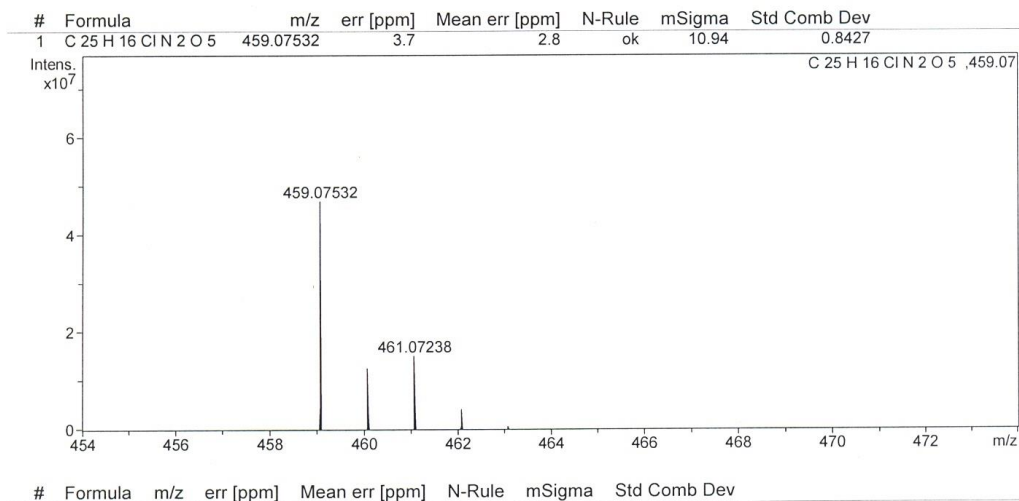

Figure 34. HRMS measurement for 5j

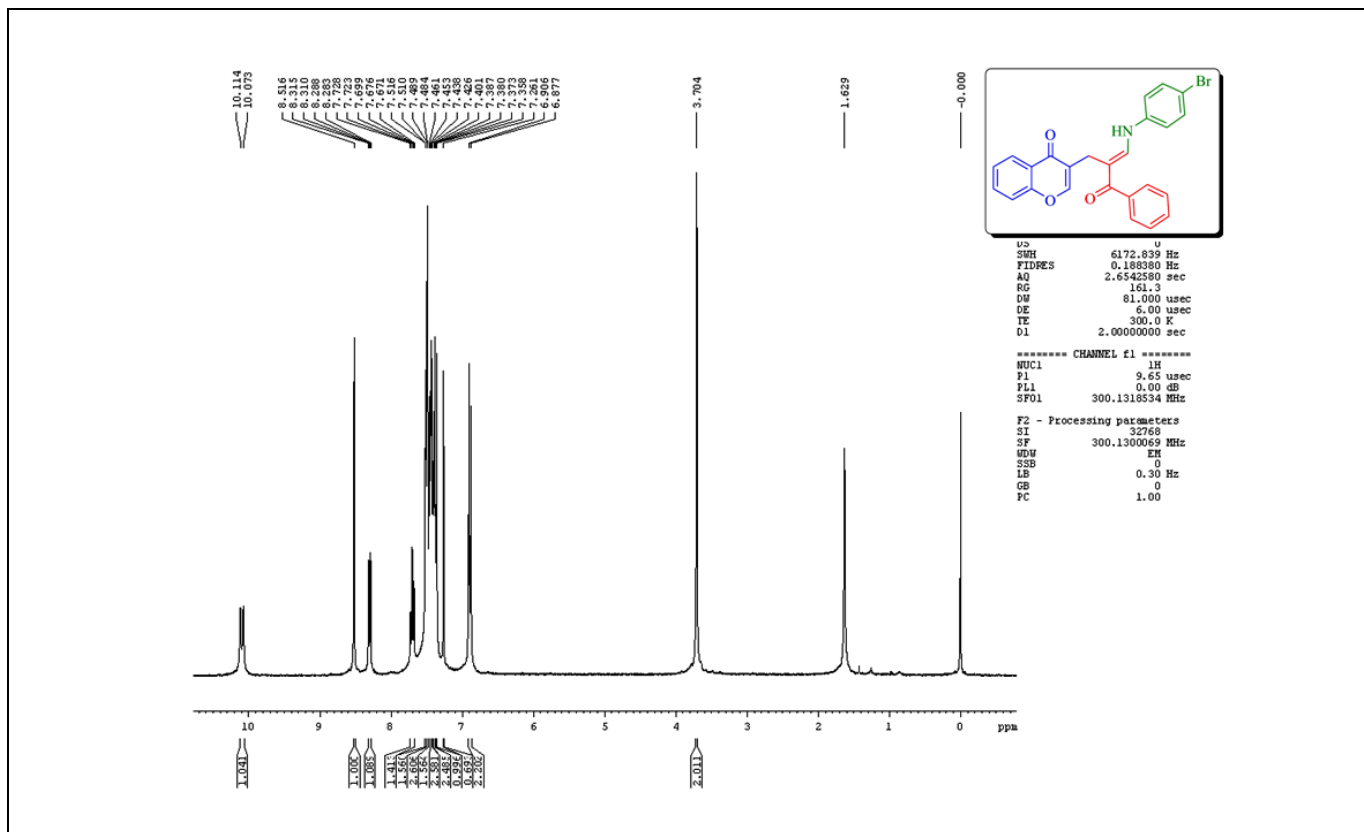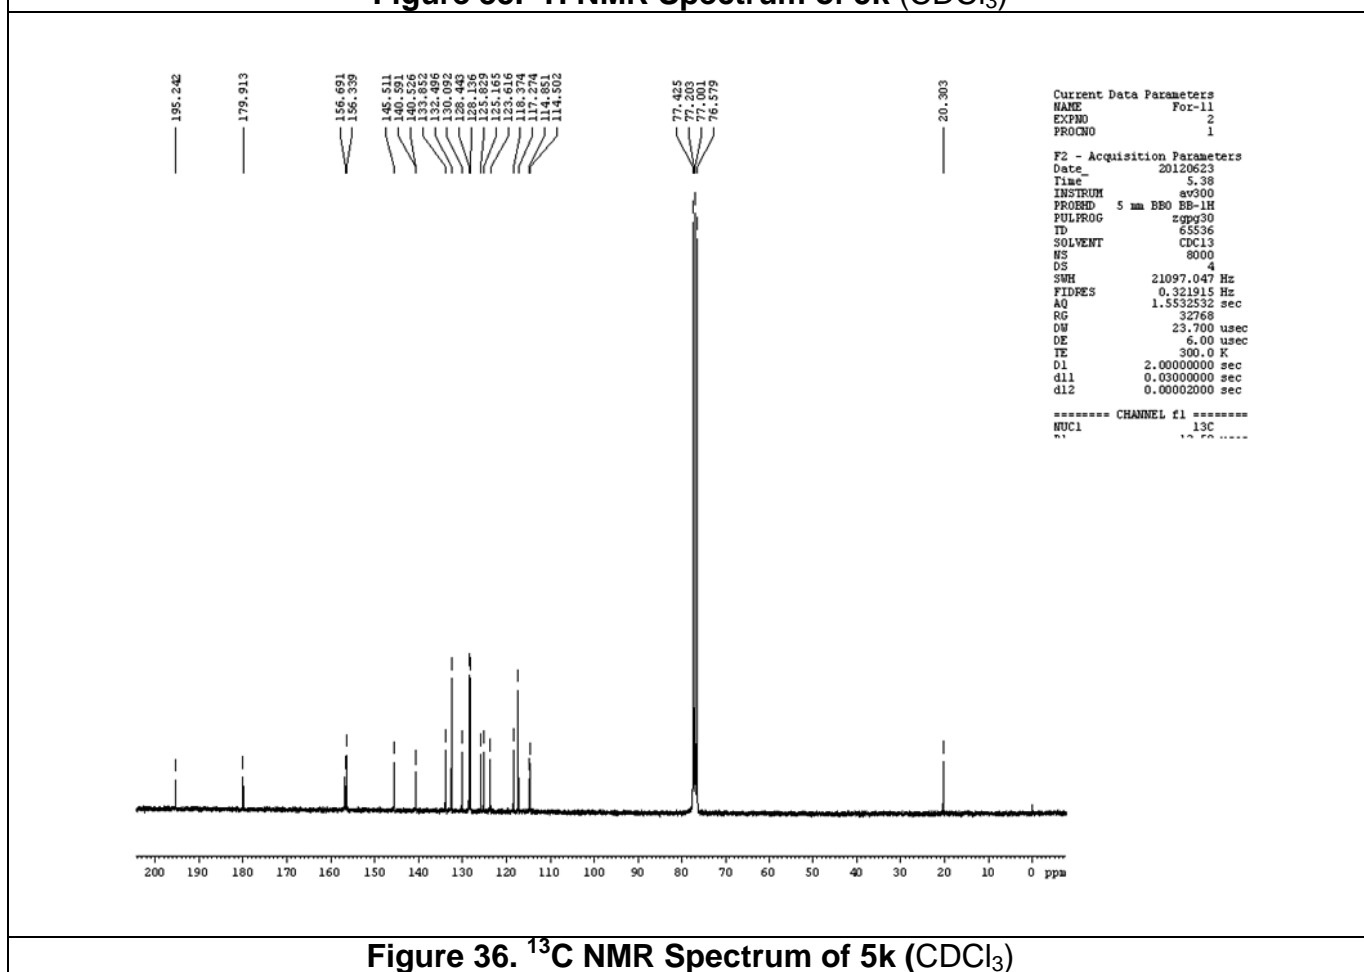

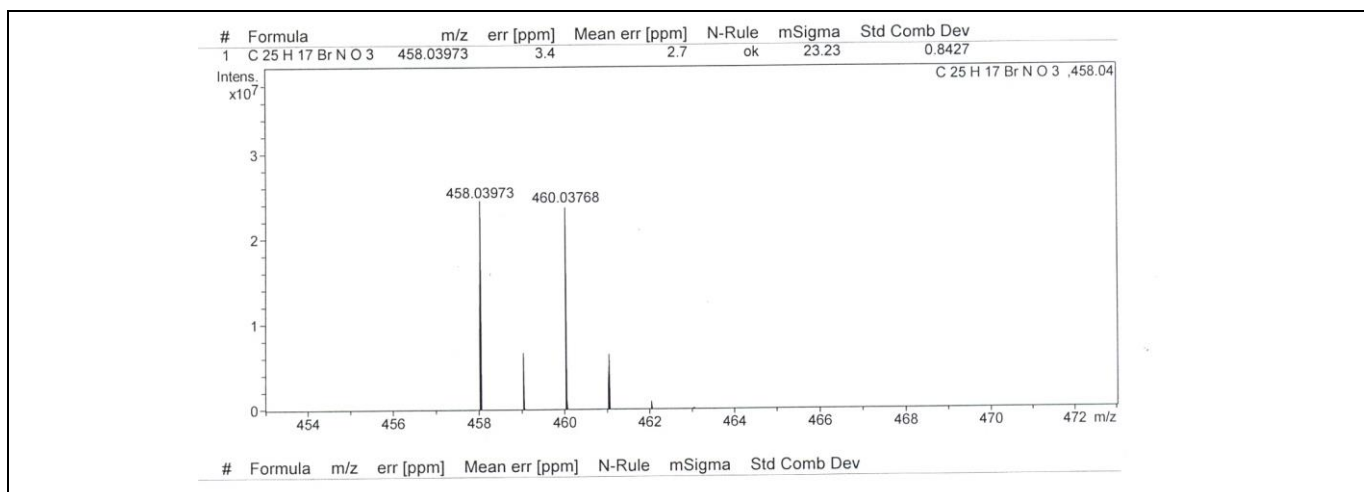

Figure 37. HRMS measurement for 5k

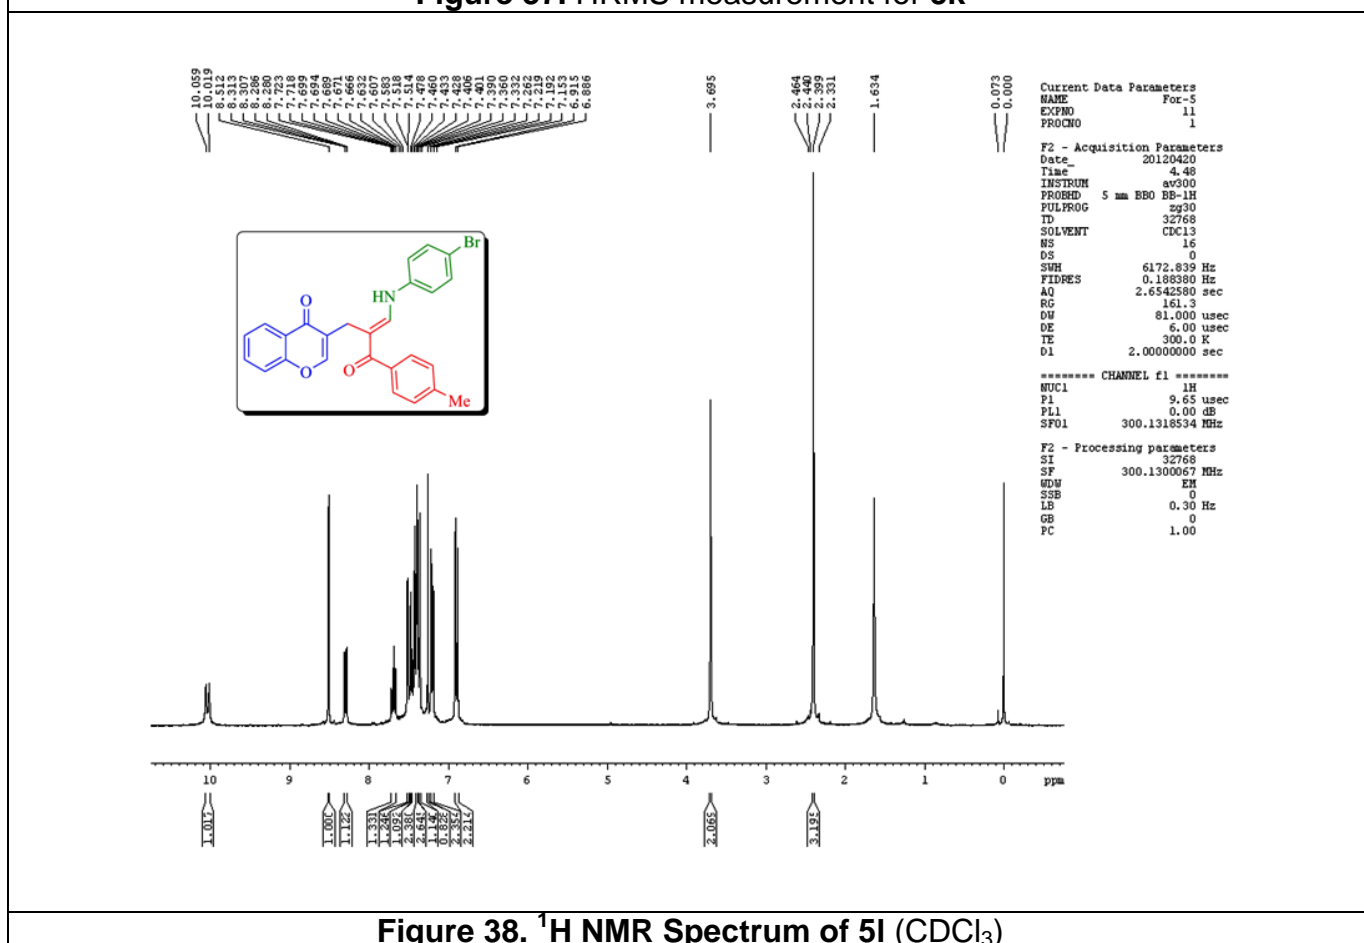

Figure 38. <sup>1</sup>H NMR Spectrum of 5l (CDCl<sub>3</sub>)

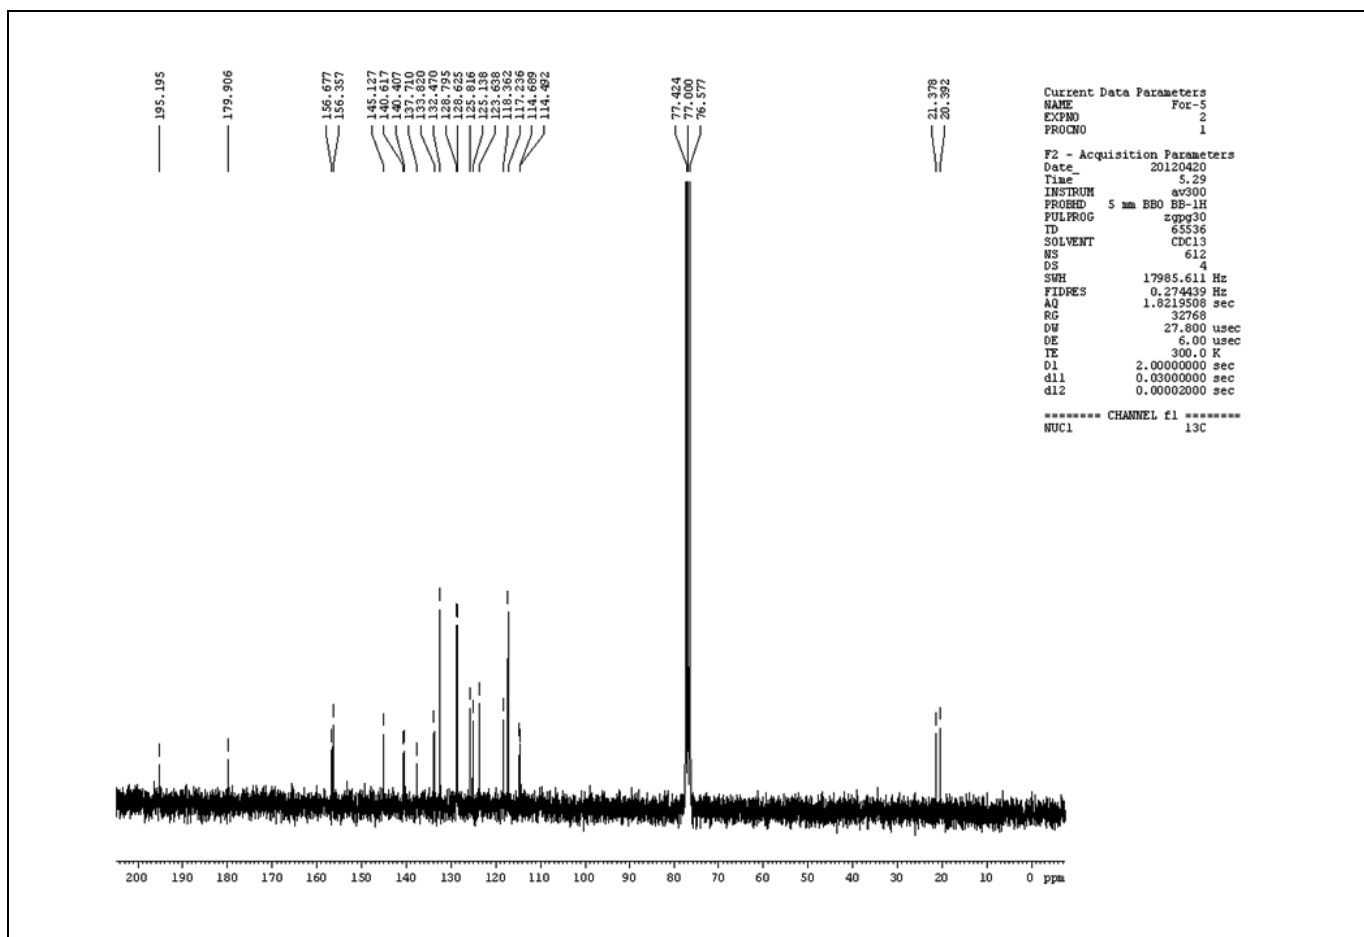

Figure 39. <sup>13</sup>C NMR Spectrum of 5I (CDCl<sub>3</sub>)

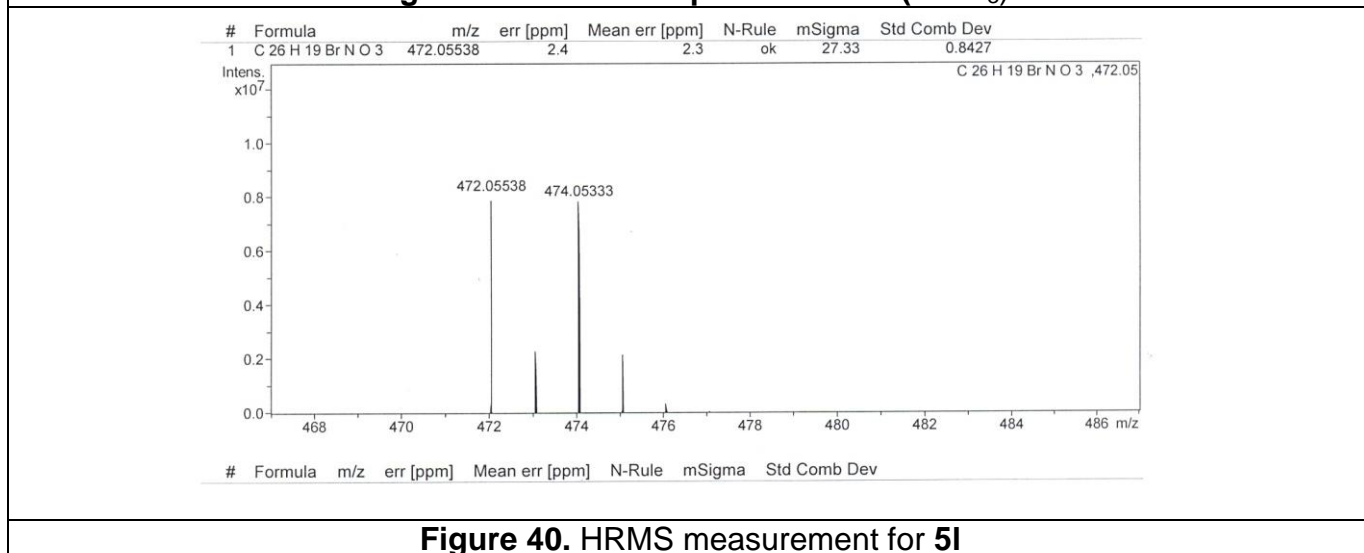

Figure 40. HRMS measurement for 5I

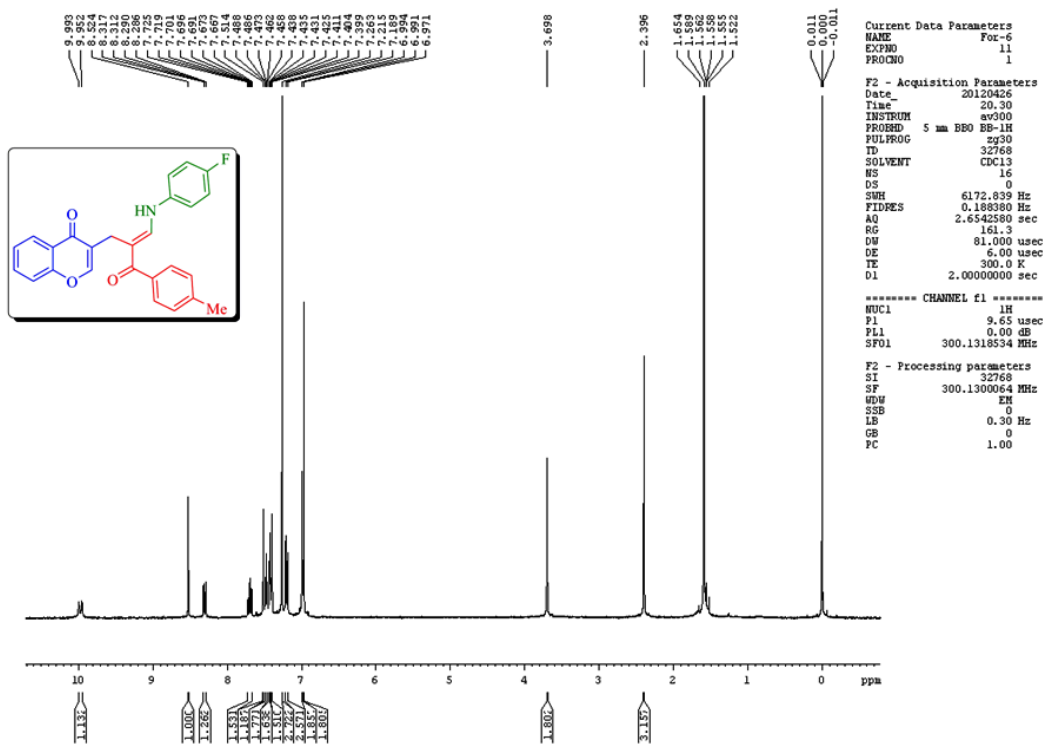

Figure 41.  $^1\text{H}$  NMR Spectrum of 5m ( $\text{CDCl}_3$ )

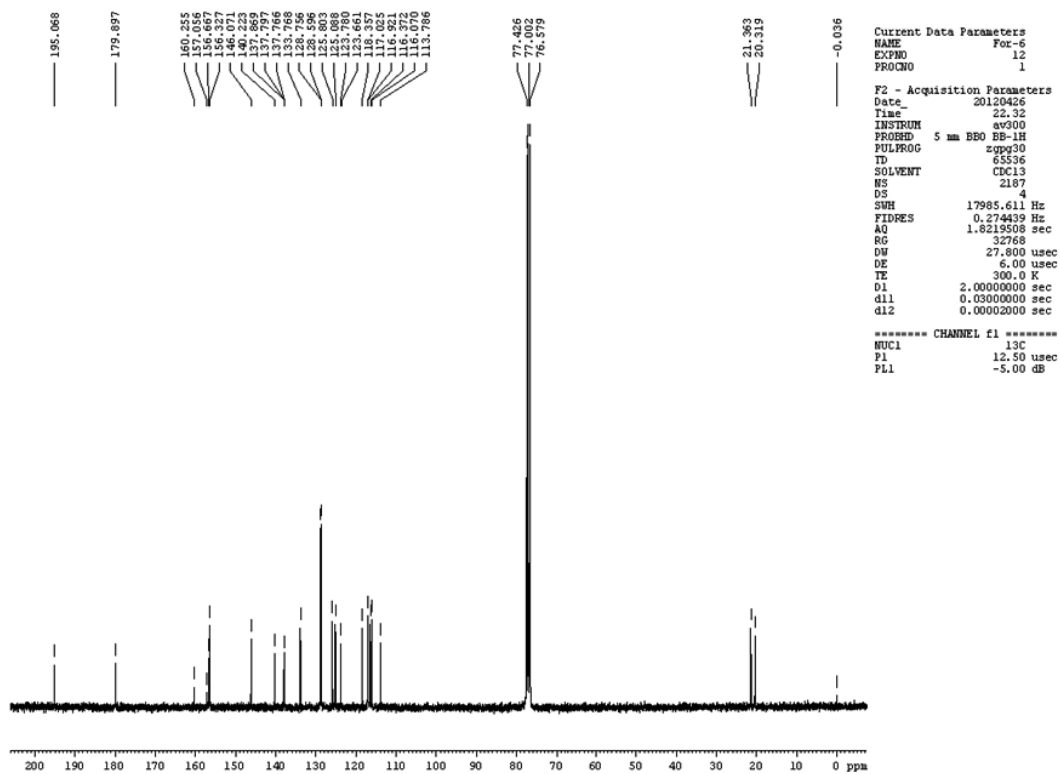

Figure 42.  $^{13}\text{C}$  NMR Spectrum of 5m ( $\text{CDCl}_3$ )

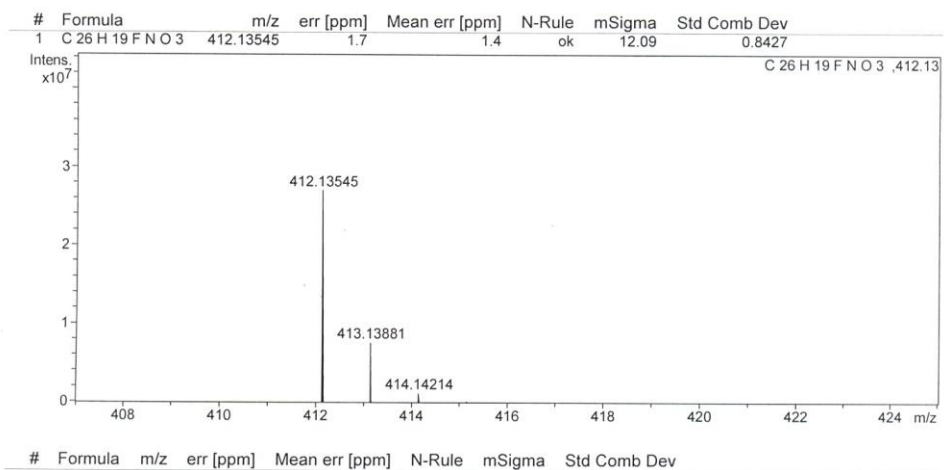

Figure 43. HRMS measurement for 5m

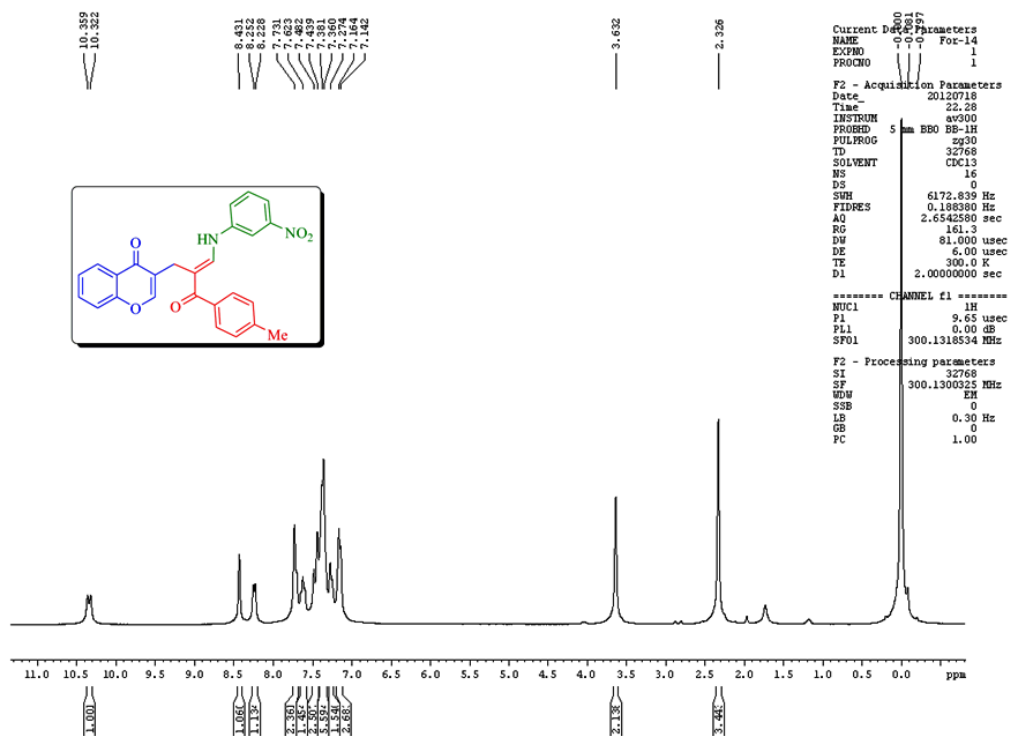

Figure 44. <sup>1</sup>H NMR Spectrum of 5n (CDCl<sub>3</sub>)



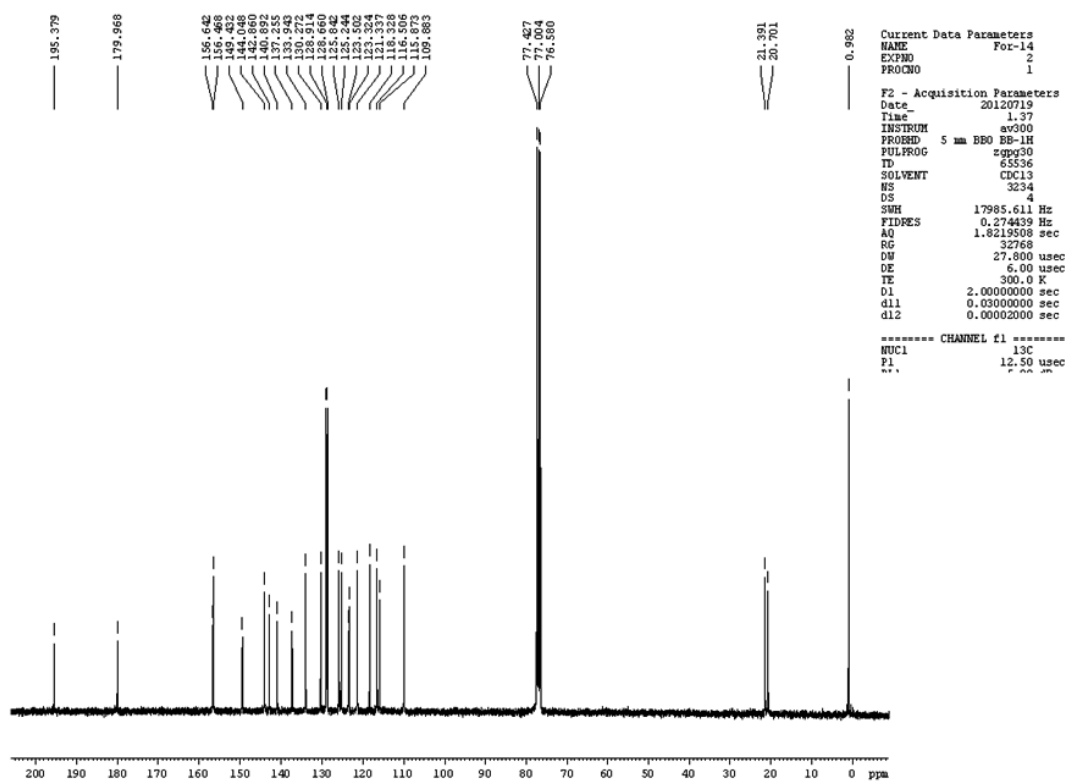

Figure 45. <sup>13</sup>C NMR Spectrum of 5n (CDCl<sub>3</sub>)

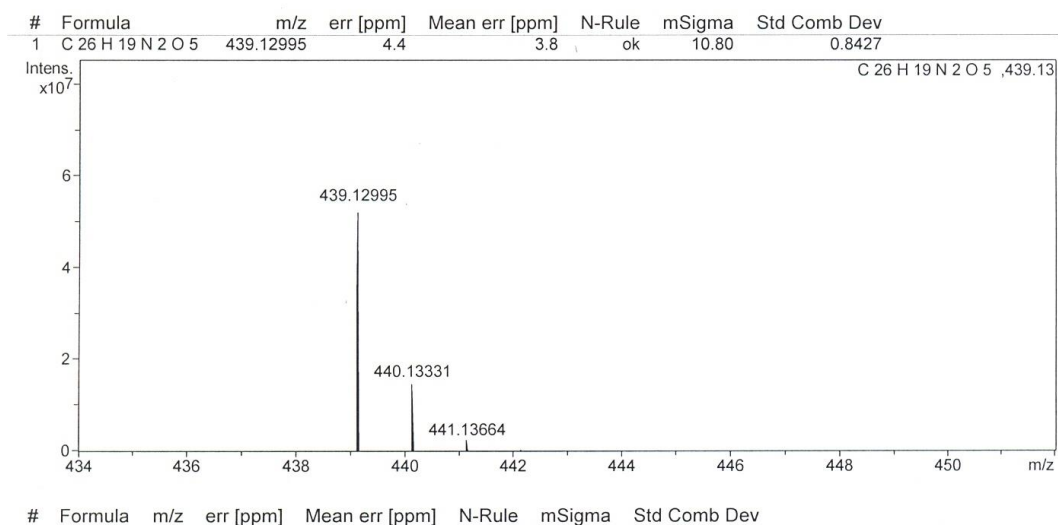

Figure 46. HRMS measurement for 5n

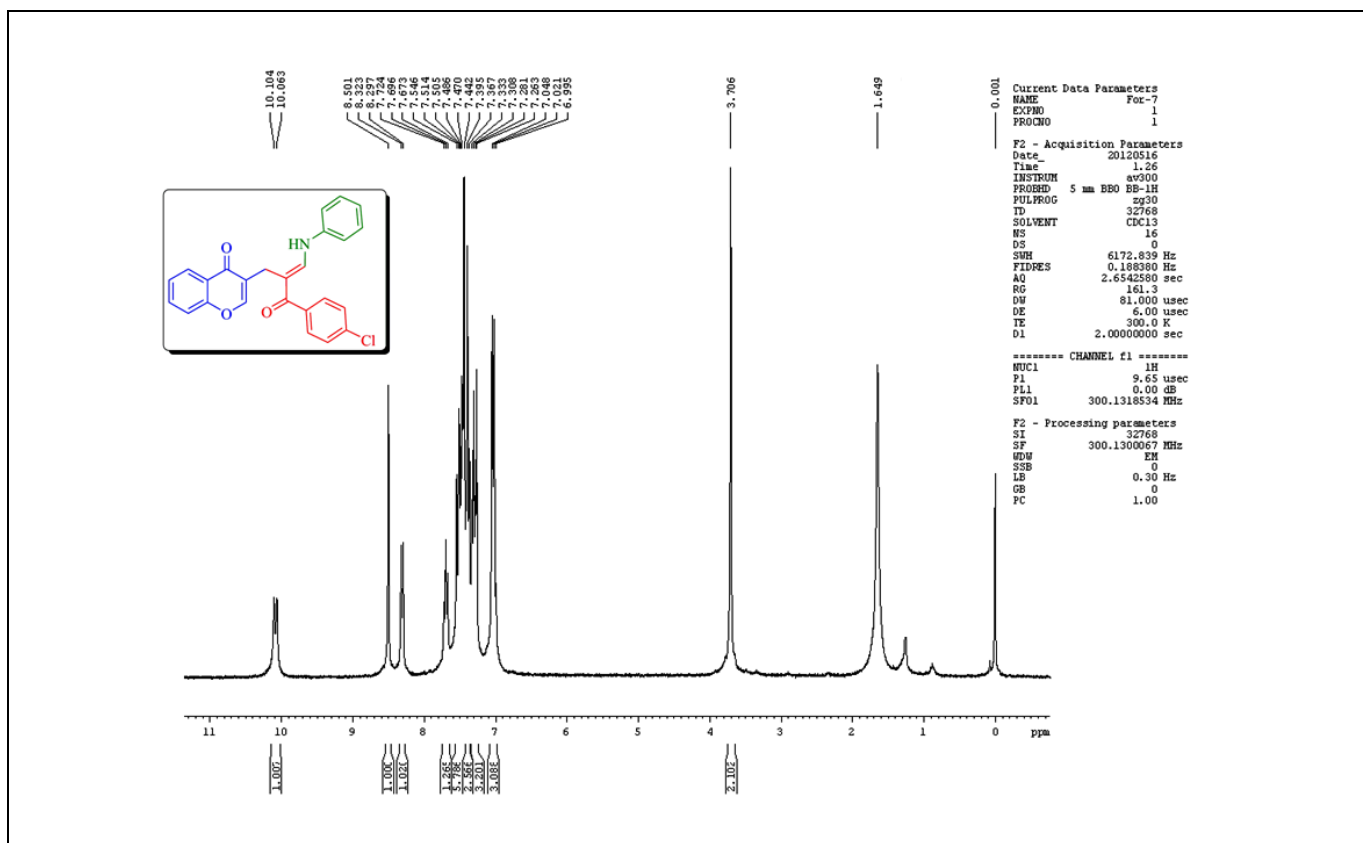

Figure 47. <sup>1</sup>H NMR Spectrum of 5o (CDCl<sub>3</sub>)

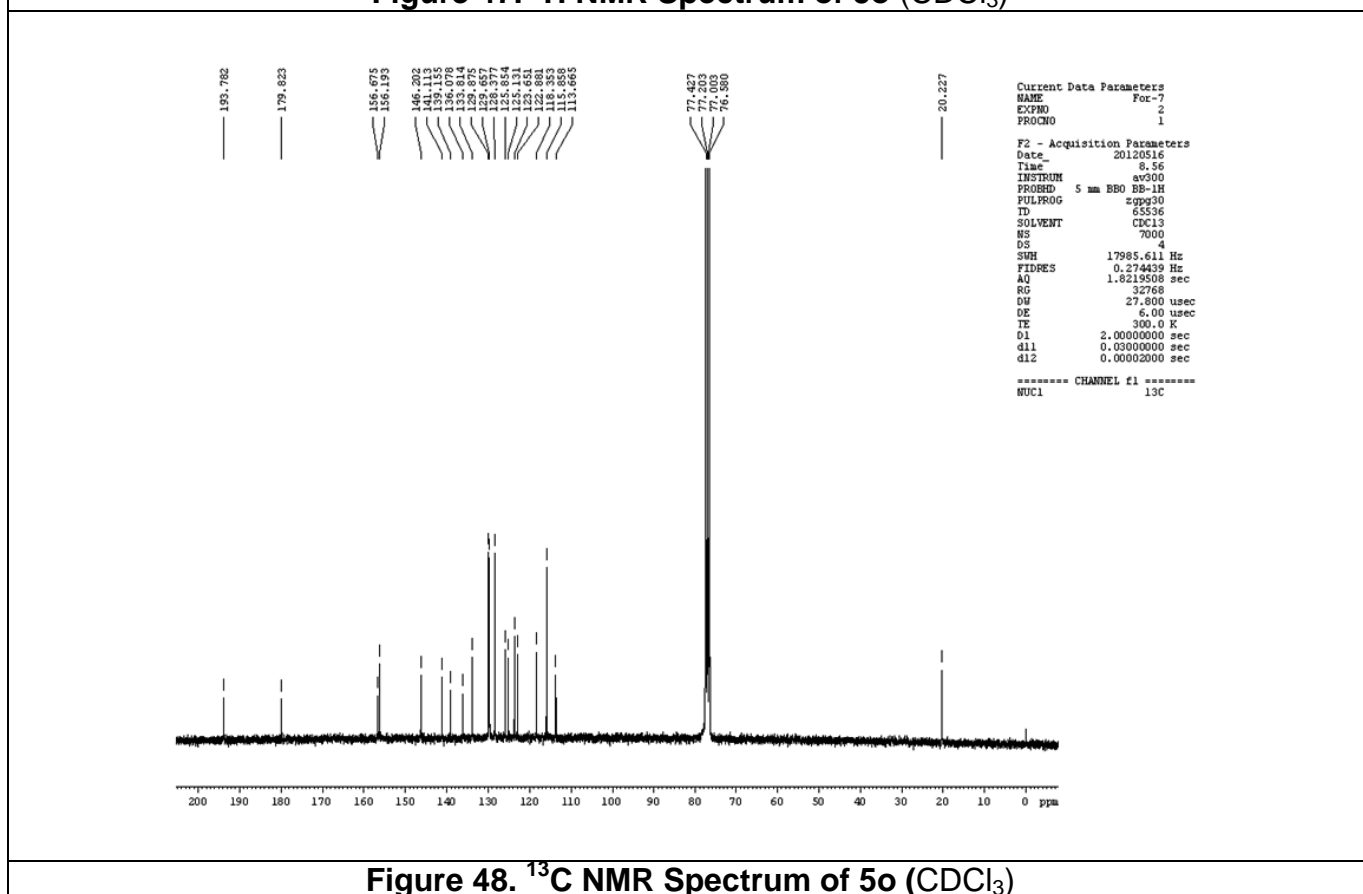

Figure 48. <sup>13</sup>C NMR Spectrum of 5o (CDCl<sub>3</sub>)

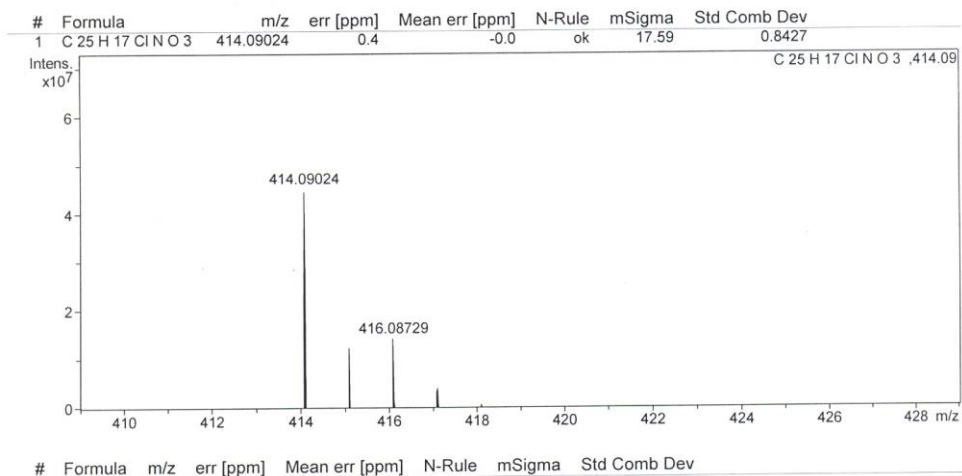

Figure 49. HRMS measurement for 5o

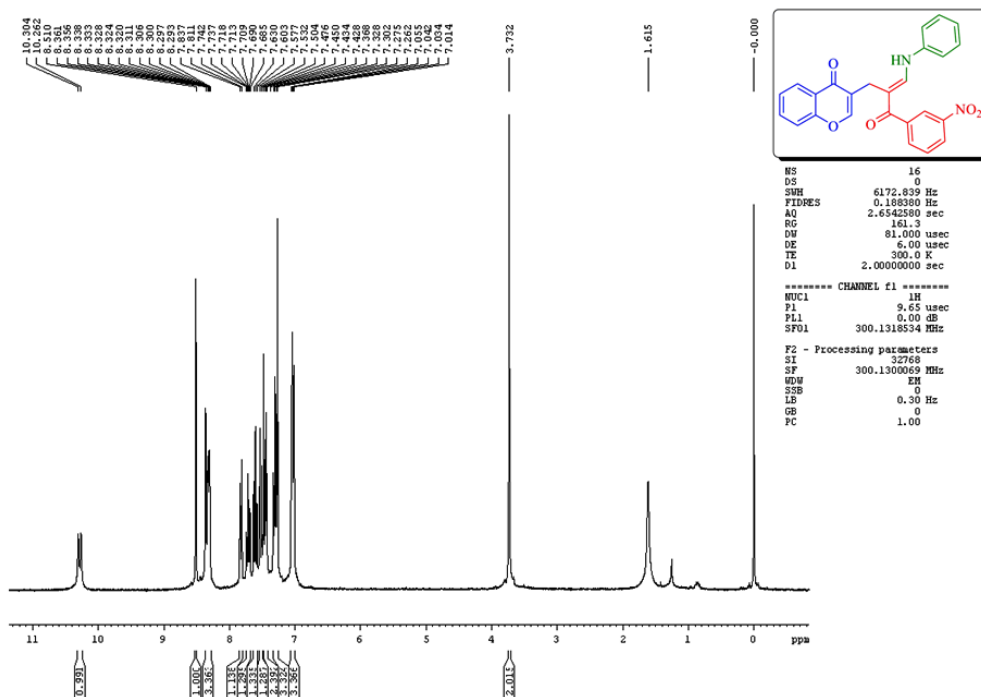

Figure 50. <sup>1</sup>H NMR Spectrum of 5p (CDCl<sub>3</sub>)

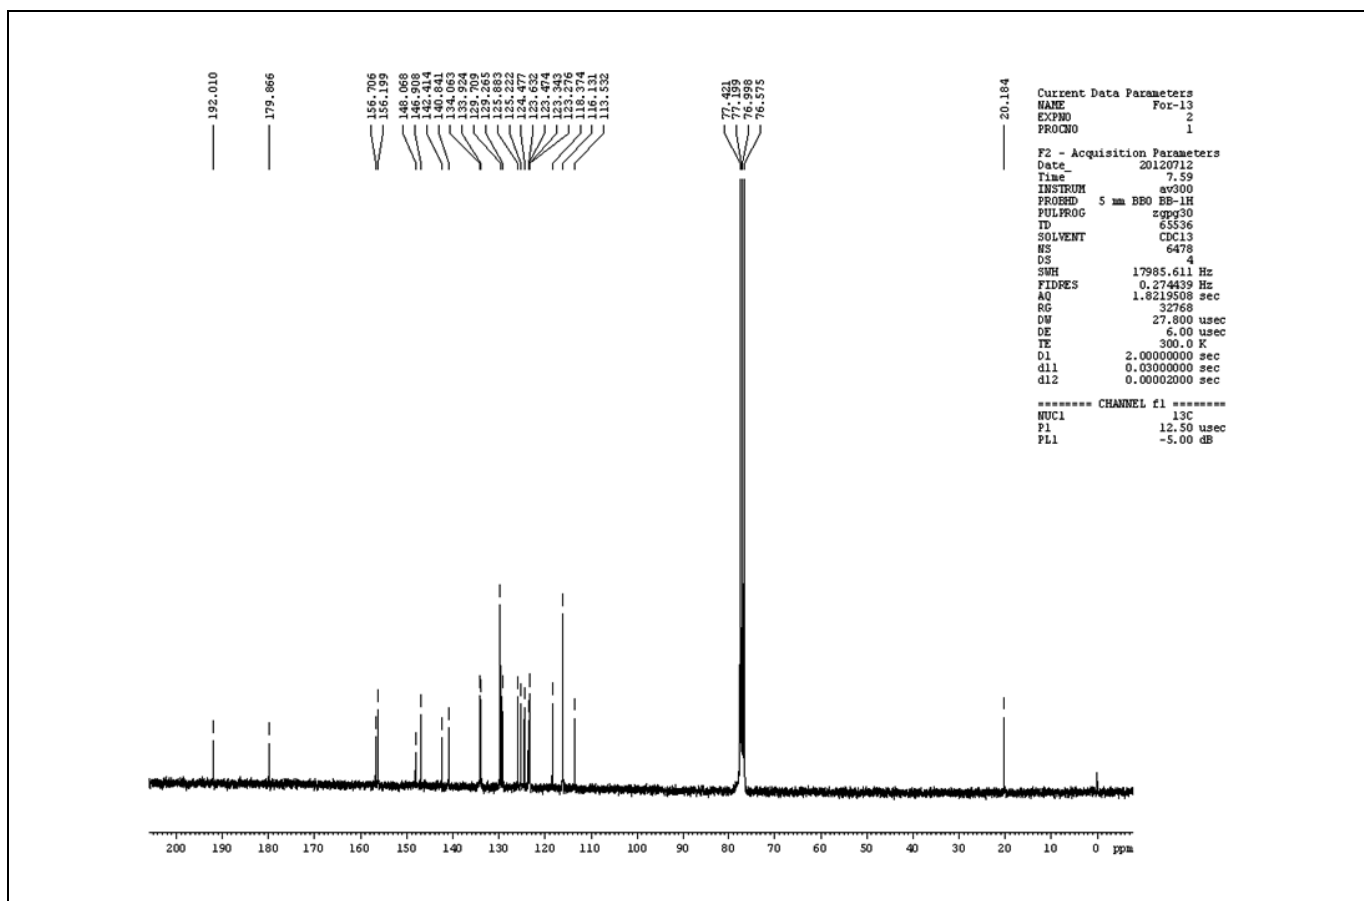

Figure 51. <sup>13</sup>C NMR Spectrum of 5p (CDCl<sub>3</sub>)

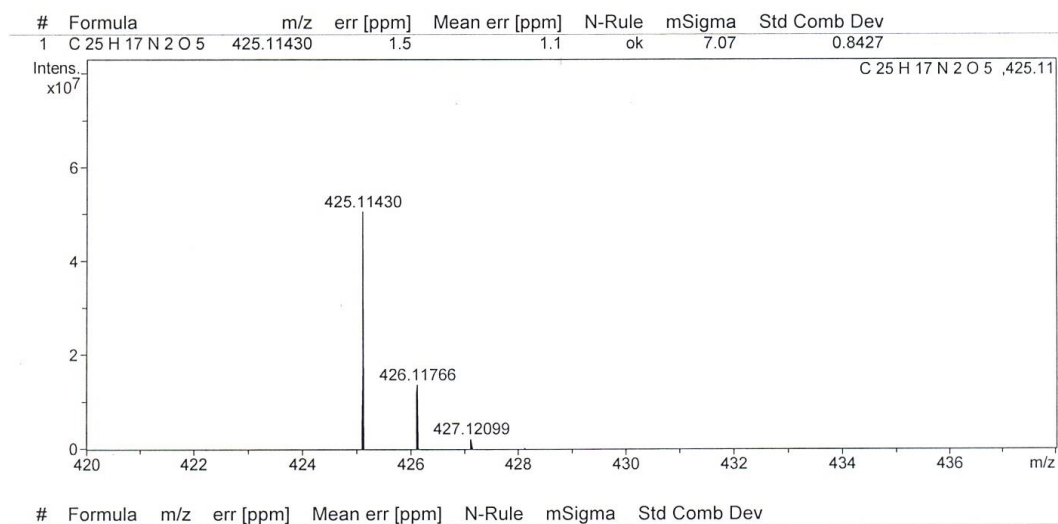

Figure 52. HRMS measurement for 5p

## Deuteration experiment

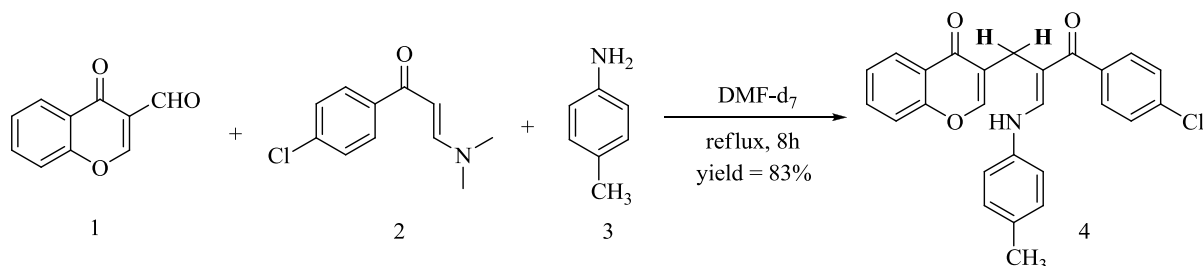

A mixture of 3-formylchromone (**1**, 0.1 mmol), enaminone **2** (0.1 mmol) and aniline **3** (0.1 mmol) in DMF- $d_7$  (1 mL) was heated to reflux for 6–7 h. The reaction progress was monitored by thin-layer chromatography. After completion of the reaction, the solvent was removed and the product was purified by column chromatography using a petroleum ether–ethyl acetate mixture (4:1 v/v) as eluent to afford compounds **4** in 83% of yield.

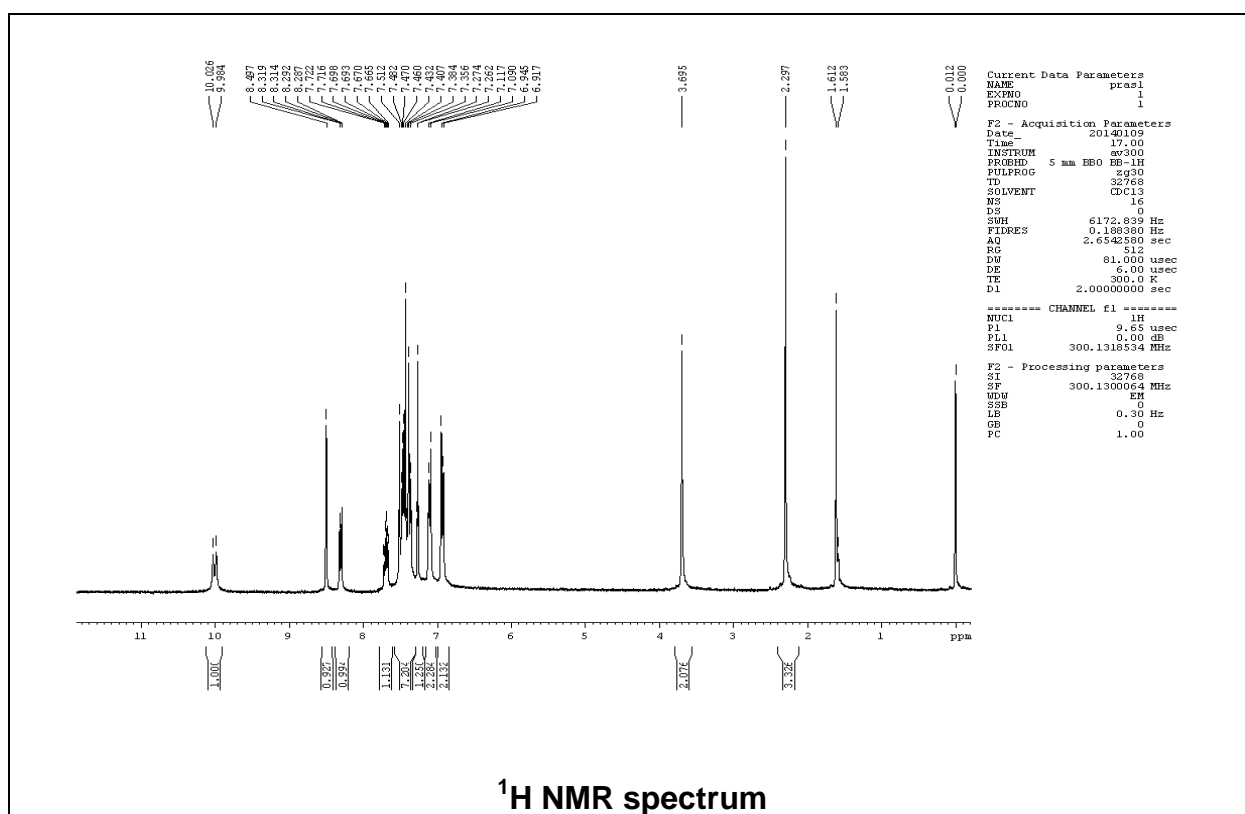

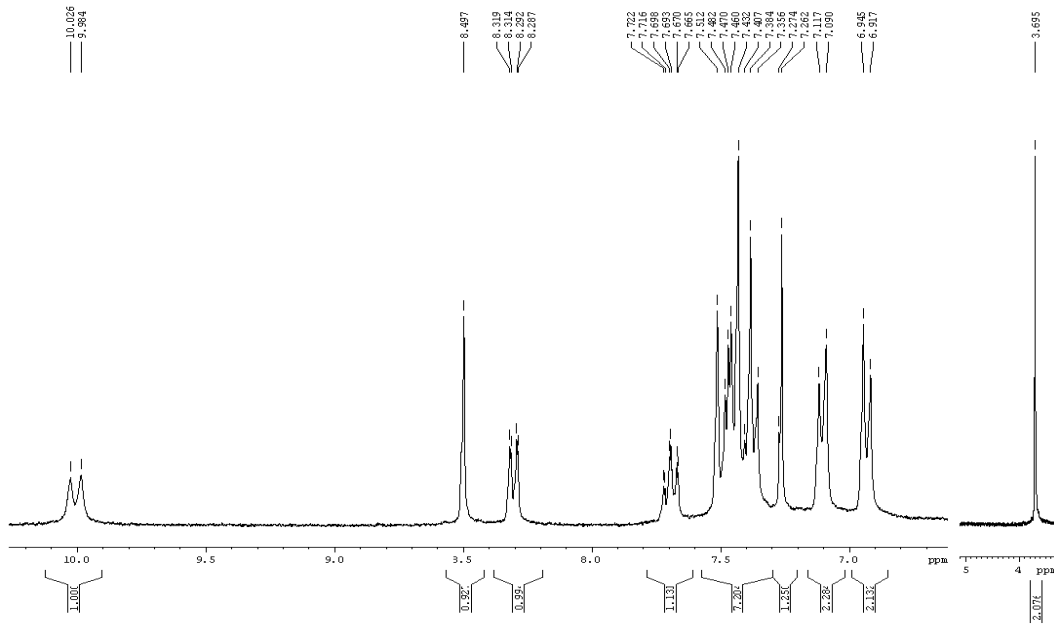

<sup>1</sup>H NMR spectrum

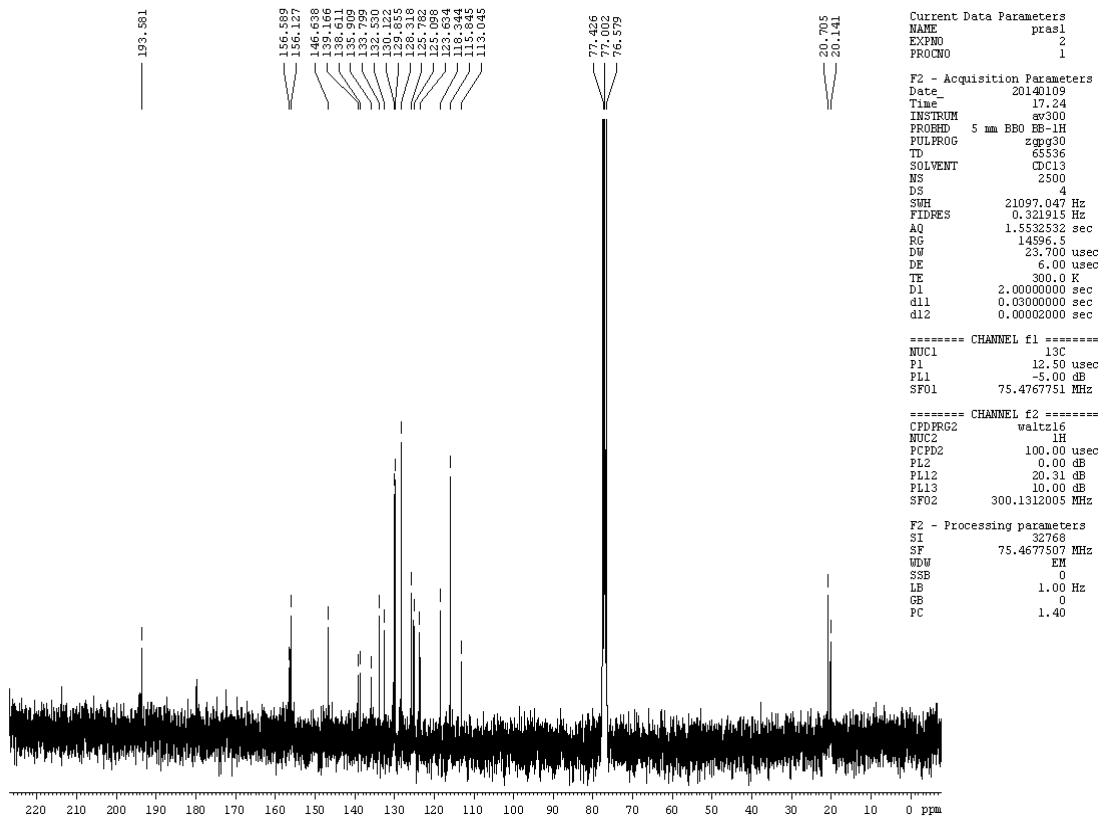

<sup>13</sup>C NMR spectrum

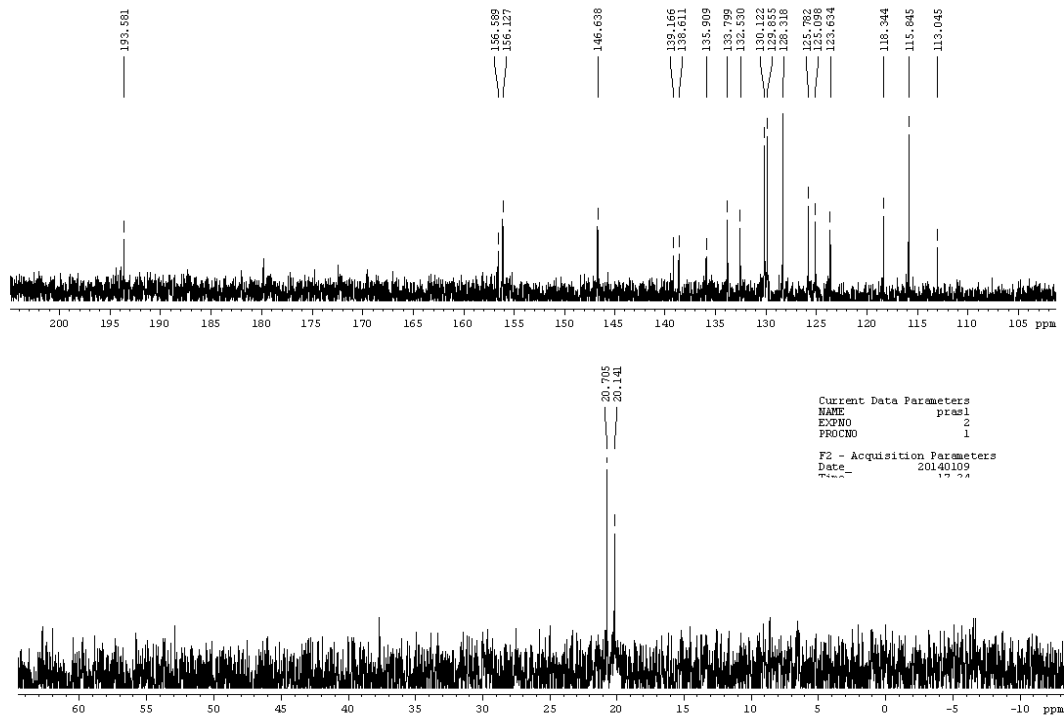

<sup>13</sup>C NMR spectrum
